1 **Full Title:** Real-time genomic and epidemiological investigation of a multi-institution  
2 outbreak of KPC-producing Enterobacteriaceae: a translational study

3

4 **Short Title:** Real-time genomic and epidemiological investigation of a KPC outbreak

5

6 Kwong JC <sup>1,2,3</sup>, Lane C <sup>4,5</sup>, Romanes F <sup>5</sup>, Gonçalves da Silva A <sup>1,4</sup>, Easton M <sup>5</sup>, Cronin K <sup>6</sup>,

7 Waters MJ <sup>6</sup>, Tomita T <sup>4</sup>, Stevens K <sup>4</sup>, Schultz MB <sup>1,4</sup>, Baines SL <sup>1,2</sup>, Sherry NL <sup>1,2,3</sup>, Carter G

8 <sup>1,2</sup>, Mu A <sup>1,2</sup>, Sait M <sup>4</sup>, Ballard SA <sup>1,4</sup>, Seemann T <sup>1,7</sup>, Stinear TP <sup>1,2</sup> & Howden BP <sup>1,2,3,4</sup>.

9

10 <sup>1</sup> Doherty Applied Microbial Genomics, and <sup>2</sup> Department of Microbiology and Immunology,

11 The University of Melbourne at The Peter Doherty Institute for Infection & Immunity,

12 Melbourne, Australia

13 <sup>3</sup> Department of Infectious Diseases, Austin Health, Heidelberg, Australia

14 <sup>4</sup> Antimicrobial Reference and Research Unit, Microbiological Diagnostic Unit Public Health

15 Laboratory, The University of Melbourne at The Peter Doherty Institute for Infection &

16 Immunity, Melbourne, Australia

17 <sup>5</sup> Health Protection Branch, Department of Health and Human Services, Victoria, Australia

18 <sup>6</sup> Department of Microbiology, St Vincent's Hospital Melbourne, Fitzroy, Australia

19 <sup>7</sup> Melbourne Bioinformatics, The University of Melbourne, Carlton, Australia

20

21 **Keywords:**

22 *Klebsiella pneumoniae* carbapenemase, KPC, whole-genome sequencing, outbreak

23 investigation

24

25

26 **Correspondence:**

27 Prof Benjamin P Howden

28 Microbiological Diagnostic Unit Public Health Laboratory

29 Doherty Institute for Infection & Immunity

30 792 Elizabeth Street

31 Melbourne, Victoria

32 Australia 3000

33 Email: [bhowden@unimelb.edu.au](mailto:bhowden@unimelb.edu.au)

34 Phone: +61 3 8344 5701

35

36 Word count:

37 Abstract 296; Main text 6288

38

39 **ABSTRACT**

40 **Background:** Until recently, KPC-producing Enterobacteriaceae were rarely identified in  
41 Australia. Following an increase in the number of incident cases across the state of Victoria,  
42 we undertook a real-time combined genomic and epidemiological investigation. The scope of  
43 this study included identifying risk factors and routes of transmission, and investigating the  
44 utility of genomics to enhance traditional field epidemiology for informing management of  
45 established widespread outbreaks.

46 **Methods and Findings:** All KPC-producing Enterobacteriaceae isolates referred to the state  
47 reference laboratory from 2012 onwards were included. Whole-genome sequencing (WGS)  
48 was performed in parallel with a detailed descriptive epidemiological investigation of each  
49 case, using Illumina sequencing on each isolate. This was complemented with PacBio long-  
50 read sequencing on selected isolates to establish high-quality reference sequences and  
51 interrogate characteristics of KPC-encoding plasmids. Initial investigations indicated the  
52 outbreak was widespread, with 86 KPC-producing Enterobacteriaceae isolates (*K.*  
53 *pneumoniae* 92%) identified from 35 different locations across metropolitan and rural  
54 Victoria between 2012-2015. Initial combined analyses of the epidemiological and genomic  
55 data resolved the outbreak into distinct nosocomial transmission networks, and identified  
56 healthcare facilities at the epicentre of KPC transmission. New cases were assigned to  
57 transmission networks in real-time, allowing focussed infection control efforts. PacBio  
58 sequencing confirmed a secondary transmission network arising from inter-species plasmid  
59 transmission. Insights from Bayesian transmission inference and analyses of within-host  
60 diversity informed the development of state-wide public health and infection control  
61 guidelines, including interventions such as an intensive approach to screening contacts  
62 following new case detection to minimise unrecognised colonisation.

63 **Conclusions:** A real-time combined epidemiological and genomic investigation proved  
64 critical to identifying and defining multiple transmission networks of KPC  
65 Enterobacteriaceae, while data from either investigation alone were inconclusive. The  
66 investigation was fundamental to informing infection control measures in real-time and the  
67 development of state-wide public health guidelines on carbapenemase producing  
68 Enterobacteriaceae management.

69

70 **BACKGROUND**

71 Carbapenemase-producing Enterobacteriaceae (CPE) are among the most urgent  
72 antimicrobial resistance threats worldwide [1]. In addition to producing the carbapenemase,  
73 capable of inactivating almost all beta-lactam antibiotics, including penicillins,  
74 cephalosporins and carbapenems, these organisms frequently harbour multiple other  
75 antibiotic resistance genes and mutations [2]. Few therapeutic options exist, and the available  
76 options are often limited by tolerability and efficacy [3, 4].

77

78 In Australia, carbapenemases have been rarely identified in Enterobacteriaceae, apart from  
79 the weakly carbapenem-hydrolysing *bla*<sub>IMP-4</sub> which has established low level endemicity [5,  
80 6]. Although small outbreaks and limited patient-to-patient transmission of CPE in Australia  
81 have been described [7-11], the majority of patients identified with CPE are thought to have  
82 acquired these organisms during international travel to endemic countries [12-16]. Limited  
83 transmission in the community has also been reported [17].

84

85 *Klebsiella pneumoniae* carbapenemases (KPCs) were first identified in the United States of  
86 America in 1996, but have since spread worldwide to be endemic in several countries  
87 including the USA, Israel, Italy, Greece, Brazil and China [18]. The first reported KPC-  
88 producing organism in Australia was isolated in 2010 from a patient who had returned to  
89 Sydney, New South Wales, after being hospitalised in Greece [19]. In 2012, KPC was first  
90 identified in the state of Victoria in a patient who had been repatriated to a metropolitan  
91 hospital also after a prolonged admission in a Greek hospital [12].

92

93 Whole-genome sequencing (WGS) has emerged as a powerful tool for bacterial strain typing  
94 and outbreak investigation [20], and has been used in public health to assess transmission of

95 *Listeria monocytogenes* and other foodborne pathogens at jurisdictional, national and  
96 international levels [21]. It has also been used at a single institution level to investigate small-  
97 to-medium sized outbreaks of KPC-producing Enterobacteriaceae [22-28]. While the details  
98 of who infected whom can be traced among a small group of individuals in conjunction with  
99 a detailed epidemiological investigation, the transmission dynamics of larger established  
100 outbreaks across multiple institutions are more difficult to resolve [29].

101

102 Due to the increasing incidence of KPC-producing Enterobacteriaceae during 2012–2014  
103 from multiple sources across the state of Victoria (approximate population 6 million), we  
104 undertook an outbreak investigation employing WGS in parallel with traditional outbreak  
105 epidemiology. Here we report the utility of advanced genomic approaches including  
106 sampling for within-host clonal diversity, Bayesian transmission modelling, and plasmid  
107 genome reconstruction to assess the transmission dynamics of the outbreak and inform  
108 infection control management in real-time during the course of the outbreak.

109

110

## 111 **METHODS**

### 112 **Laboratory and Genomic Methods**

113 *Isolate selection and antimicrobial susceptibility assays.* From 2012, following the first KPC  
114 isolate in the state, all Victorian diagnostic microbiology laboratories were asked to refer  
115 suspected carbapenemase-producing isolates to the Microbiological Diagnostic Unit Public  
116 Health Laboratory (MDU) for further testing. Suspected isolates were defined as  
117 Enterobacteriaceae with a meropenem minimum inhibitory concentration (MIC)  $\geq 0.5$  mg/L  
118 or zone diameter (ZD)  $\leq 23$  mm, or an imipenem MIC  $\geq 2$  mg/L or ZD  $\leq 23$  mm. Isolates with  
119 a positive colorimetric (e.g. Rapidec® CarbaNP [30]) or molecular (e.g. Cepheid  
120 GeneXpert® [31]) test were also requested. Duplicate KPC-producing Enterobacteriaceae  
121 isolates of the same species from a patient during a single hospital admission were usually  
122 excluded by referring laboratories. However, for some patients, multiple isolates were  
123 referred to MDU if they originated from different laboratories, and were subsequently  
124 included in the analyses.

125

126 Species identification was confirmed using matrix-assisted laser desorption/ionisation time-  
127 of-flight (MALDI-TOF) mass spectrometry (VITEK® MS, bioMérieux, France) with routine  
128 susceptibilities tested on selected isolates using VITEK® 2 Compact (AST-N246 cards,  
129 bioMérieux, France). All suspected CPE isolates meeting the above criteria underwent testing  
130 for carbapenemase genes using polymerase chain reaction (PCR) (Supplementary Table S1).  
131 Isolates confirmed as KPC-producing organisms underwent WGS and were included in the  
132 genomic analyses, with the respective patients included in the epidemiological investigation.  
133 Isolates obtained prior to 2014 were sequenced retrospectively, while WGS was performed  
134 prospectively during the outbreak on isolates collected from 2014 onwards.

135

136 **Multiple colony sampling.** To understand the genomic diversity present within a single  
137 individual and assess the influence on reconstructing transmission networks, primary faecal  
138 specimens were obtained from one patient. After overnight culture on Brilliance™ CRE  
139 (Thermo Fisher, Waltham, Massachusetts, US) selective media, 10-15 colonies, including  
140 any that differed in colony morphology, were selected from the plates for DNA extraction  
141 and WGS. Multiple colony sampling and sequencing for other patient samples was not  
142 performed due to cost limitations.

143

144 **DNA extraction and whole genome sequencing.** Bacterial cultures were purified for DNA  
145 extraction by two successive single colony selections after streaking onto horse blood agar  
146 incubated overnight at 37°C. DNA was extracted from a liquid suspension of the purified  
147 cultures using the QIAmp DNA Mini Kit (Qiagen, Hilden, Germany) or the JANUS  
148 Chemagic Workstation with the Chemagic Viral DNA/RNA kit (CMG-1033; PerkinElmer,  
149 Waltham, Massachusetts, US).

150

151 WGS was performed on the Illumina MiSeq or NextSeq platforms using Nextera XT libraries  
152 and protocols (Illumina, San Diego, California, US) with a minimum average quality score of  
153 30 and a target sequencing depth of  $\geq 50x$  as previously described [32]. Isolates not meeting  
154 these metrics were resequenced. Raw sequence data has been uploaded to the Sequence Read  
155 Archive under BioProject PRJNA397262.

156

157 Single molecule real-time (SMRT) sequencing of one *Klebsiella pneumoniae* and one  
158 *Citrobacter farmeri* isolate was also performed on the PacBio RS II platform (Pacific  
159 Biosciences, Menlo Park, California, US) using previously reported methods [32]. In brief,  
160 genomic DNA was extracted using a GenElute™ Bacterial Genomic DNA kit (Sigma-



161 Aldrich, St. Louis, Missouri, USA) and SMRTbell libraries were prepared using  
162 manufacturer protocols (Pacific Biosciences, Menlo Park, California). Libraries underwent an  
163 additional size-selection step using a 20-kb template BluePippin size-selection protocol (Sage  
164 Science, Beverly, Massachusetts, USA).

165

166 **Bioinformatic analyses.** Illumina raw sequencing reads were trimmed to clip Nextera  
167 adapters and low-quality sequence (Phred score <10) using *Trimmomatic* v0.36 [33]. The  
168 trimmed reads were assembled *de novo* with the *SPAdes* v3.7.1 assembler [34] and auto-  
169 annotated with *Prokka* v1.12-beta [35]. The SMRT analysis portal v2.3.0.140936 (Pacific  
170 Biosciences) was used for isolates sequenced on the PacBio RS II, with raw sequence reads  
171 assembled *de novo* using the HGAP3 protocol, and error correction and polishing with  
172 *Quiver* v1. Further error correction was performed by mapping Illumina short reads from the  
173 same isolate to the PacBio assembly with *Pilon* v1.21 [36] and *Snippy* v3.2  
174 (<https://github.com/tseemann/snippy>). The completed genome assemblies have been  
175 uploaded to GenBank under BioProject PRJNA397262.

176

177 From the annotated assemblies, the multi-locus sequence type (MLST) was determined *in*  
178 *silico* as was the presence or absence of antimicrobial resistance (“resistome”) and other  
179 genes (pan-genome) using BLAST-based tools (<https://github.com/tseemann/mlst>)  
180 (<https://github.com/tseemann/abricate>) (<https://github.com/sanger-pathogens/Roary>) [37]. The pan-  
181 genome data was imported into *FriPan* (<https://github.com/drpowell/FriPan>) for web-browser  
182 visualisation using a Python script (<https://github.com/kwongj/roary2fripan>), and annotated  
183 genomes were visualised in *Geneious* v7.1.5 (<http://www.geneious.com/>).

184

185 Sequencing reads were also aligned to a reference genome to produce a reference-based  
186 whole-genome alignment including single nucleotide polymorphism (SNP), invariant and  
187 missing sites (<https://github.com/tseemann/snippy>). This alignment was then trimmed to exclude  
188 plasmid sites (<https://github.com/kwongj/trim-aln>). Putative regions of recombination were  
189 predicted using *ClonalFrameML* v1.0 [38], and masked in the alignment  
190 (<https://github.com/kwongj/cfml-maskrc>). Core genome SNP sites were extracted from the  
191 recombination-filtered alignment [39] and a maximum likelihood phylogenetic tree inferred  
192 from the resulting SNP alignment in *RAxML* v8.2.4 [40], using a General Time Reversible  
193 model of nucleotide substitution with a  $\Gamma$  model of rate heterogeneity and four rate  
194 categories, with 1000 bootstrap replicates to determine branch support. Hierarchical Bayesian  
195 Analysis of Population Structure (*hierBAPS*) [41] was used to provide further support for  
196 identifying phylogenetic clades, with clustering performed using 8 levels in the hierarchy (L)  
197 and the prior maximum number of clusters (maxK) set at 10. Publicly available sequencing  
198 data was retrieved from the National Center for Biotechnology Information (NCBI) Sequence  
199 Read Archive and GenBank for comparison with local genomes (Supplementary Tables S2  
200 and S3). Three reference genomes were used. The initial genomic analysis was performed  
201 using KPNIH24 (GenBank accession CP008797), with PacBio sequences of internal isolates  
202 (*K. pneumoniae* AUSMDU00008079; GenBank accession SAMN07452764 and *C. farmeri*  
203 AUSMDU00008141; GenBank accession SAMN07452765) used for subsequent analyses to  
204 minimise inaccuracies and biases from using distant genomes and draft genome assemblies as  
205 references (Fig S1).

206

207 The genomic context of the *bla*<sub>KPC</sub> gene was investigated using a custom Python script  
208 (<https://github.com/kwongj/contig-puller>) to extract and align *de novo* assembled contigs  
209 carrying the gene. The flanking *Tn4401* transposon regions were compared to previously

210 described isoforms [42-45], using *BLAST+* [46]. Plasmid replicons were identified in genome  
211 assemblies using *BLAST+* against the *PlasmidFinder* database [47]. Plasmids were presumed  
212 to carry KPC if *bla<sub>KPC</sub>* was identified on the same contiguous sequence of DNA as the  
213 plasmid replicon.

214

215 Bayesian evolutionary analyses were also conducted to ascertain if the genomic signal could  
216 estimate the date of emergence of any outbreak clusters, and if any additional data could help  
217 inform where and when transmission events were taking place. A recombination-filtered  
218 chromosomal alignment was obtained as described above. The subsequent alignment was  
219 used as input into *BEAST2* v2.4.3 [48] with collection dates entered for each isolate. The  
220 relationship between root-to-tip distance and date of isolation was assessed in *TempEst* v1.5  
221 [49]. We fitted a model with a relaxed log-normal clock [50] to the alignment to account for  
222 inter-clade variation, assuming a HKY model for nucleotide substitution with  $\Gamma$  distributed  
223 among site rate variation [51], and used a constant population size coalescent prior on the  
224 genealogy. Nodes were selected for logging the likely time of the most recent common  
225 ancestor (MRCA) for major clades identified in the maximum likelihood tree. We used eight  
226 Markov chain Monte Carlo (MCMC) runs of 100 million states, with sampling every 5000  
227 states, and a burn-in of 50 percent. The posterior samples from each chain were checked in  
228 *Tracer* v1.6 (<http://tree.bio.ed.ac.uk/software/tracer/>) for convergence, and then grouped into  
229 a single chain. The posterior samples for the dates of the nodes of interest were annotated on  
230 a maximum clade credibility tree and exported.

231

232 The maximum clade credibility tree was used as input into *TransPhylo* v1.0 [52] to  
233 reconstruct the transmission chain. We based our prior for generation time (the time from  
234 primary infection of an individual to any subsequent secondary infection) on a previous study

235 on the duration of carriage of KPC-producing Enterobacteriaceae [53], assuming detection of  
236 KPC as an indicator of likelihood for onwards transmission. We therefore used a Gamma  
237 distribution with shape parameter 1.2 and scale 1.0 for the generation time prior, with a  
238 distribution mean of 1.2 years (438 days), standard deviation 1.096 years (400 days), and  
239 mode 0.2 years (73 days). The MCMC was run for 100000 iterations, with transmissions  
240 inferred from a consensus transmission tree.

241

242 ***Outbreak genomic investigation.*** An initial analysis using the bioinformatic methods  
243 described above was performed in 2014 on 41 KPC-producing *K. pneumoniae* isolates that  
244 had undergone WGS, including *de novo* genome assembly, *in silico* multi-locus sequence  
245 typing (MLST), resistance gene detection and phylogenetic analysis. Subsequently, a  
246 customised, in-house pipeline was developed to streamline and automate handling of  
247 sequence data for ongoing assessment and analysis (<https://github.com/tseemann/nullarbor>).  
248 A summary report was generated for each set of isolates run through Nullarbor including  
249 quality control metrics, MLST, resistome and pan-genome comparison, and a maximum  
250 likelihood phylogeny inferred from the core SNP alignment [54].

251

252 From this initial report, clonal complex (CC) 258 isolates underwent further analysis using a  
253 PacBio-assembled reference genome of a local isolate for a higher resolution core genome  
254 SNP alignment and phylogenetic comparison. As additional KPC-positive isolates were  
255 identified over time, the *Nullarbor* pipeline was repeated in an iterative process to establish  
256 the genomic relationship of new isolates to existing isolates, and where new CC258 isolates  
257 were identified, the CC258-specific analysis was also repeated with the new isolates. These  
258 analyses were interpreted together with epidemiological data in real-time as new cases  
259 emerged (see below – “Real-time outbreak investigation, analysis and reporting”). Additional

260 detailed analyses, including recombination filtering and Bayesian temporal analyses, were  
261 performed *ad hoc* to gain an overall understanding of the outbreak, and although were not  
262 used to directly inform infection control of individual cases, were used to inform overall  
263 outbreak management and guideline development.

264

## 265 **Epidemiological Methods**

266 Following the results of the initial genomic analysis and concern regarding local  
267 transmission, the ongoing genomic investigation was accompanied by collection of detailed  
268 epidemiological data, retrospectively for cases detected prior to 2014 and in real-time from  
269 2014.

270

271 **Ethics.** Data were collected as part of an outbreak investigation through the Victorian  
272 Department of Health and Human Services under the Public Health and Wellbeing Act 2008  
273 (<https://www2.health.vic.gov.au/about/legislation/public-health-and-wellbeing-act>).

274

275 **Data Collection.** All patients from whom KPC-producing Enterobacteriaceae were identified  
276 from the first isolate in 2012 to 31 December 2015 were included in the epidemiological  
277 investigation. A case report form was developed to collect detailed epidemiological data,  
278 especially regarding patient hospitalisation details. Patients, or their next of kin, were  
279 interviewed by phone to ascertain demographic information on age, sex, country of birth, and  
280 risk factors for CPE such as hospitalisation and medical procedures, overseas travel, and  
281 comorbidities. Where a patient was in a healthcare facility at the time of specimen collection,  
282 or reported hospitalisation in the 12 months prior to initial CPE identification, medical  
283 records from each hospitalisation were examined to obtain data on specimen collection,  
284 clinical details of infection or colonisation, procedures and patient movements both before

285 and after CPE identification, where available. Treating doctors, general practitioners and  
286 infection control personnel were contacted to obtain additional and/or missing information.  
287 Patient hospital admission data were collated and used to identify putative transmission  
288 networks of patients linked by proximity in time and space.  
289  
290 Once identified with KPC, patients were assumed to be colonised indefinitely, thus  
291 subsequent KPC isolates were deemed to constitute the same patient episode and  
292 epidemiological data were not re-collected. KPC-producing Enterobacteriaceae isolated from  
293 normally sterile sample sites *e.g.* blood, cerebrospinal fluid, pleural fluid, were considered to  
294 represent “infections”. Isolates obtained from non-sterile sites (*e.g.* urine, wound swab,  
295 aspirate from intra-abdominal collection) where clinical evidence of infection was present  
296 and the patient was treated with antibiotics with activity against KPC-producing organisms,  
297 or where the treating clinician identified infection but elected to palliate the patient, were also  
298 considered to represent “infections”. Other isolates were considered to represent  
299 “colonisations”, unless no epidemiological data were available (“unknown”).

300

### 301 **Infection control investigation**

302 For patients where local transmission of KPC-producing Enterobacteriaceae was suspected,  
303 interviews were conducted with infection control practitioners (ICPs) at the facility with  
304 putative transmission. Data were collected on environmental and contact screening activities,  
305 patient follow up and patient management alerts, isolation and collection of subsequent  
306 screening specimens.

307

308 **Outbreak reporting and oversight**

309 Data from both genomic and epidemiological investigations were analysed together in real-  
310 time, and reported back to the Victorian Department of Health and Human Services. Where  
311 transmission events were recognised, the healthcare institutions involved were also informed.  
312 An incident management team was established through the Department of Health and Human  
313 Services to oversee the investigation and management of the outbreak.

314

315 **RESULTS**

316 A total of 86 KPC-producing Enterobacteriaceae were referred to MDU between 2012-2015  
317 from 69 patients in 26 different healthcare facilities, six general practices and three aged care  
318 facilities across both metropolitan and rural Victoria (Fig 1) (Supplementary Table S4).

319 Specimen source was reported for 85 of the isolates, with most specimens being urine (n =  
320 42; 49%), faeces or rectal swabs (n = 20; 23%), or blood cultures (n = 10; 12%). Almost all  
321 isolates were KPC-2 producing Enterobacteriaceae, apart from two KPC-3 producing *K.*  
322 *pneumoniae* isolates from the one patient. Overall, 79 of the isolates were *K. pneumoniae*,  
323 five were *Citrobacter farmeri*, and one isolate each of were *Klebsiella oxytoca* and  
324 *Citrobacter freundii*.

325

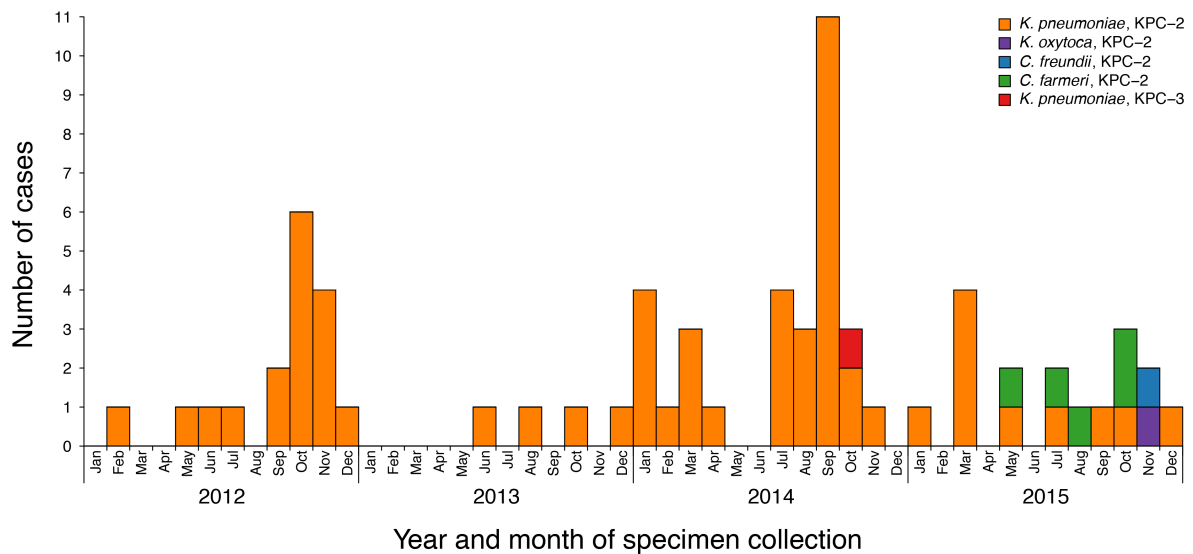

326

327 **Fig 1: Incidence of new KPC-producing Enterobacteriaceae cases referred to MDU PHL, 2012-**  
328 **2015.**

329 Blocks are coloured by the species and KPC allele of the referred isolates. Repeated detections of KPC-  
330 producing isolates from the same patient have been excluded.

331

332



333 **Initial genomic analysis**

334 In the initial analysis, 40/41 (98%) *K. pneumoniae* isolates collected from 29 patients prior to  
335 June 2014 were clonal complex (CC) 258 by *in silico* MLST, with all of these belonging to  
336 clade 1 of sequence type (ST) 258 *K. pneumoniae* described by Deleo *et al.* [55], based on  
337 analysis of the capsular polysaccharide gene island. Phylogenetically, these isolates clustered  
338 together in comparison to other previously reported international ST258 *K. pneumoniae*  
339 isolates (Supplementary Fig S2 & Fig S3). Analysis of the local ST258 isolates revealed three  
340 distinct phylogenetic clades involving patients in 20 different healthcare locations, supported  
341 by pairwise SNP distributions and Bayesian Analysis of the Population Structure (Fig 2 &  
342 Supplementary Fig S4).

343

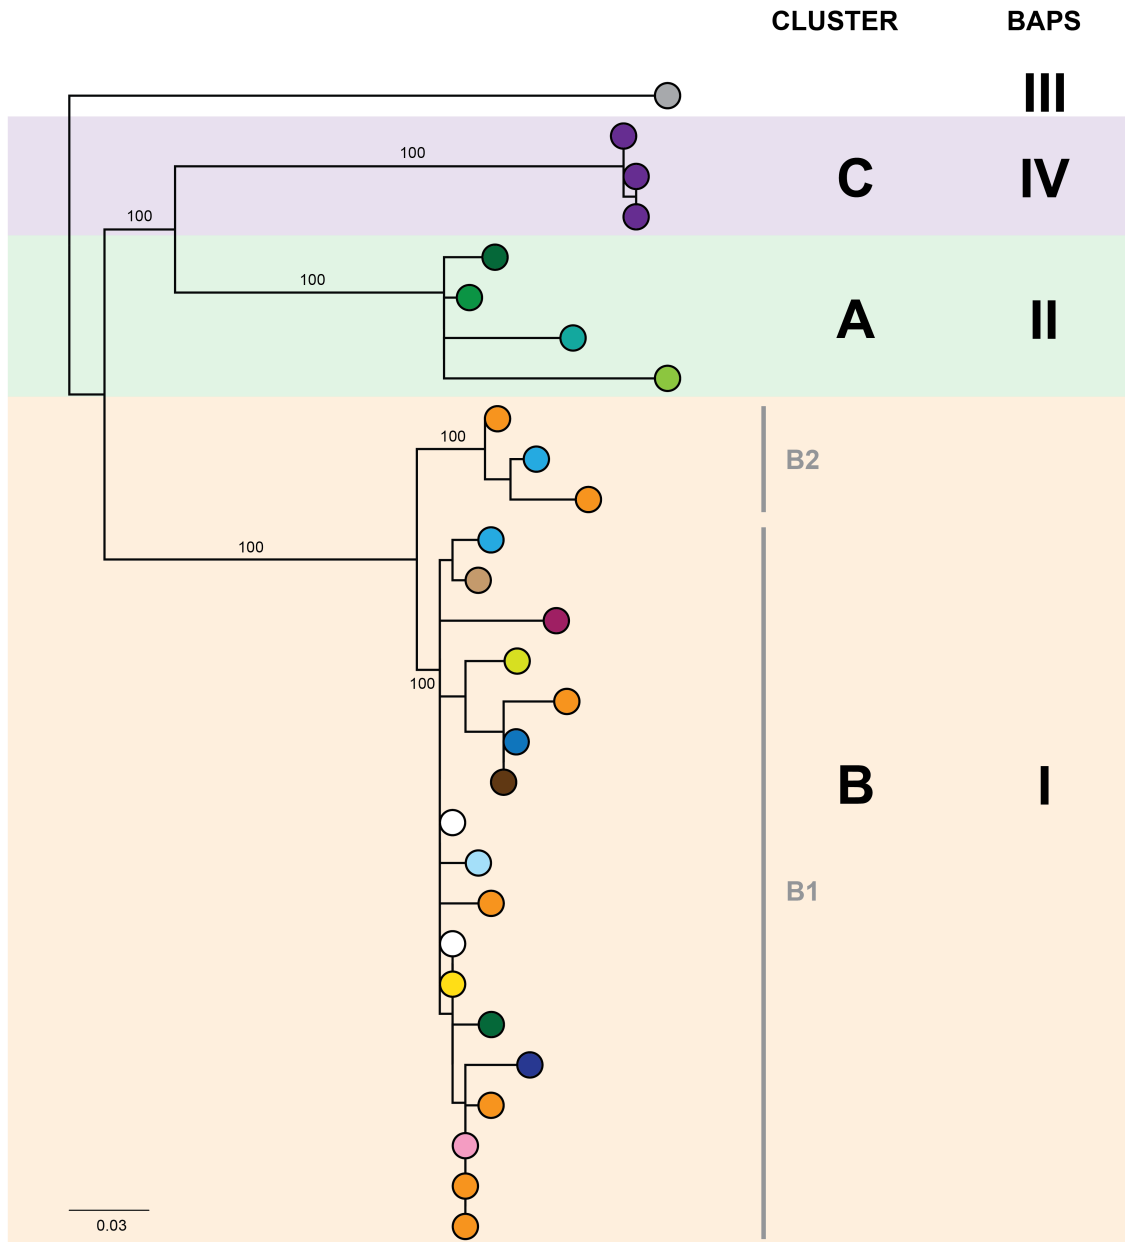

344

345 **Fig 2: The initial maximum likelihood phylogenetic tree comprised three dominant clades.**

346 The tree includes 29 ST258 *K. pneumoniae* isolates collected from 29 patients prior to June 2014, with  
347 external nodes coloured according to healthcare facility at time of sample collection. Recurrent isolates  
348 from each patient have been excluded. Support values (%) from 1000 bootstrap replicates are shown  
349 for major branches. Major phylogenetic clades have been labelled cluster A (green shading), B (orange  
350 shading), and C (purple shading) in the order that the clades emerged, with the larger clade B comprising  
351 two subclades, B1 and B2. Corresponding clusters identified through Bayesian Analysis of the  
352 Population Structure (BAPS) are also shown. The tree was rooted using an outgroup isolate (*K.*  
353 *pneumoniae* NJST258\_1, GenBank accession: CP006923.1; not shown in the tree) from a different  
354 ST258 clade.

355

356

## 357 **Epidemiological analysis**

358 A total of 57 patients were found to harbour isolates belonging to CC258 from 2012-2015.  
359 Most patients presented to the Emergency Department (n=7) or were admitted to hospital  
360 (n=44) at the time of initial specimen collection. Thirty-three (58%) were male, and the  
361 median age of the affected patients was 74 (range 20 – 94; IQR 62-83) (Supplementary Table  
362 S5). Clinical infection was suspected in 61% of the cases, with the most common  
363 presentation being urinary tract infection (n=24; 42%). Sepsis was reported in 63% of those  
364 with infection due to KPC-producing *K. pneumoniae*. KPC-producing isolates were obtained  
365 from patients with clinical infection more commonly during 2012-2014 than 2015, where  
366 >50% of the KPC-producing isolates identified were colonising or screening isolates  
367 (Supplementary Fig S5).

368  
369 Of patients from whom a complete travel history was able to be obtained (n=46), 22 (48%)  
370 reported overseas travel since 1996, and only eight (14%) reported travel in the 12 months  
371 prior to hospitalisation, strongly reinforcing the suspicion of local transmission of KPC. All  
372 57 patients were found to have been hospitalised in Australian healthcare facilities in the 12  
373 months prior to initial positive specimen collection, with a median length of stay of 61  
374 inpatient days (range 0-181 days; IQR 34-101). Four patients had fewer than ten inpatient  
375 days in an Australian healthcare facility during this period, three of whom had recent  
376 overseas hospitalisation, for which complete hospitalisation data could not be collected.

377  
378 A detailed analysis of patient admission data was undertaken in attempt to identify location  
379 or source of acquisition. Forty-one patients (72%) had previously attended one facility  
380 (Facility F) in the 12 months prior to initial identification of a KPC-producing isolate.  
381 However, the remaining 16 patients reported no hospitalisation in this facility, and 18

382 additional facilities were identified in which two or more patients had been admitted. Three  
383 putative transmission networks were identified based on overlapping admissions to the same  
384 hospital ward at the same time among patients detected with KPC. It became apparent that  
385 due to the sheer number of hospitalisations and the complexity of patient movements,  
386 drawing firm conclusions on who transmitted to whom and where transmission had occurred  
387 solely from epidemiological data would be difficult (Fig 3 & Supplementary Fig S6).

388



401 **Combined analysis of CC258 KPC-2-producing *K. pneumoniae* isolates**

402 Despite identification of three distinct phylogenetic clades in the initial genomic analysis (Fig  
403 2), we were unable to exactly define where transmission was occurring as the samples were  
404 distributed across multiple locations. Of the three clades (designated as genomic cluster A, B  
405 and C), cluster C had the best correlation with an epidemiologically-defined transmission  
406 network, comprising isolates from patients in the same healthcare facility at the same time  
407 (Fig 3). However, other correlations were not immediately apparent. Cluster A included  
408 isolates from three patients in three different facilities that were within the same healthcare  
409 network and/or were geographically located in the same region within a 20 km radius, though  
410 were 30 km away from the fourth patient in a different healthcare network in the cluster.  
411 Cluster B included isolates from patients in 12 different locations across the state of Victoria,  
412 separated by up to 500 km. Seven isolates were obtained from patients attending local general  
413 practice (primary care) clinics.

414

415 Using the genomic data to enhance and allow flexibility in the epidemiological data (*e.g.*  
416 including admissions to adjacent wards or admissions separated by a few days as  
417 “overlapping”), it became apparent that each of the genomic clusters corresponded to a  
418 separate transmission network (Fig 4). The largest of these (cluster B) was located at a single  
419 institution (Facility F), and as further isolates were identified, two subclusters (B1, B2) were  
420 defined. Cluster B2 included isolates arising from suspected transmission in mid-2014 in an  
421 inpatient aged care ward, while cluster included isolates from a number of patients who were  
422 admitted to facility F in 2012, though to several different wards. A second transmission  
423 network in cluster B1 was identified in another aged care ward in 2015. The predicted  
424 transmission network corresponding with cluster C was also confirmed, with the isolate  
425 genomes differing by <5 SNPs, and the corresponding epidemiological data for the respective

426 patients showing overlapping hospital admissions to a single hospital ward in late 2013 (Fig  
427 5).  
428

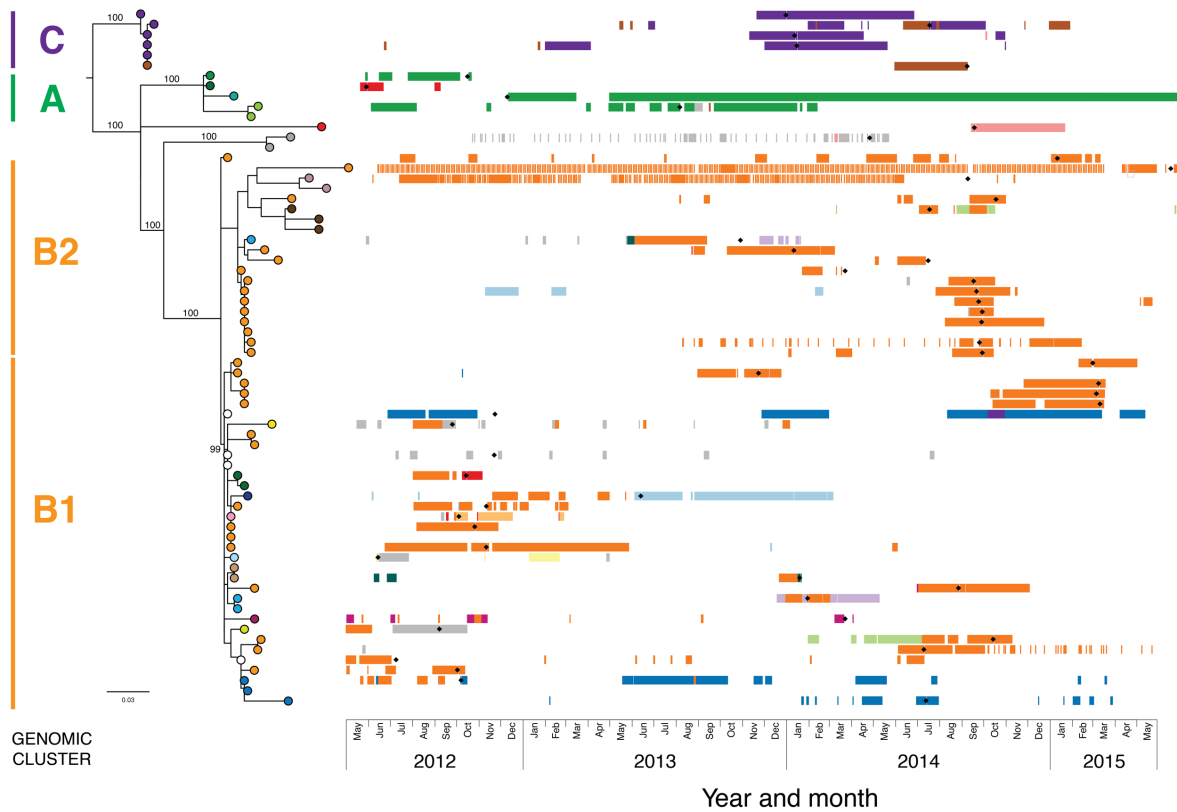

429

430 **Fig 4: Combined analysis, with genomic relationships between isolates overlaid upon**  
431 **epidemiological data, delineated multiple transmission networks.**

432 A maximum likelihood phylogenetic tree is shown on the left, labelled with major genomic clusters  
433 and supporting branch bootstrap values (%) from 1000 replicates for major branches. Nodes of the  
434 tree are coloured by healthcare facility at the time of sample collection. Coloured horizontal bars on  
435 the right indicate healthcare facility admissions over time (x axis), with different colours representing  
436 different healthcare networks. Black diamonds (◆) indicate first detection of KPC for each patient.

437

438

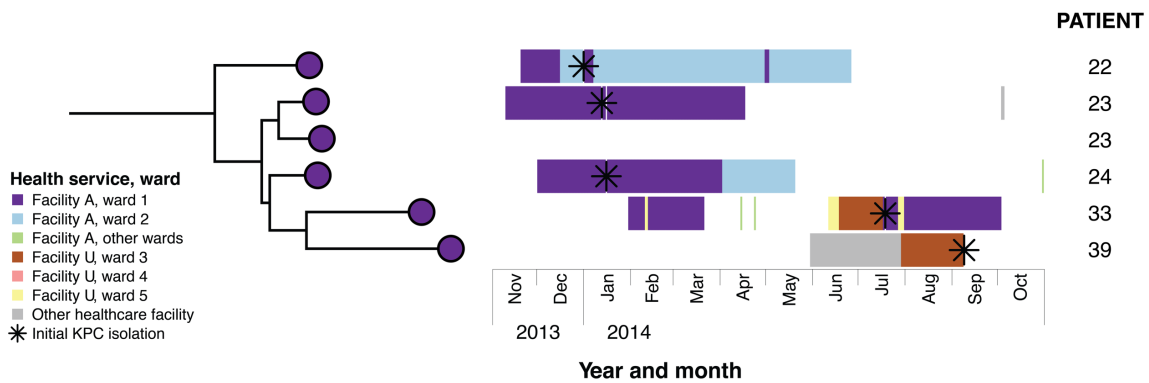

439

440 **Fig 5: Combined analysis of genomic and epidemiological data of the cluster C network**  
 441 **identified secondary transmission.**

442

443 Example case study: Patients 22 and 23 both reported overseas hospitalisation in the 12 months prior  
 444 to first detection of KPC – patient 22 in Vietnam for spinal surgery following a motor vehicle  
 445 accident, and patient 23 in Greece for stem cell therapy. Both patients had undergone rectal screening  
 446 on admission to Ward 1 in Facility A, with patient 22 being placed in intensive contact precautions for  
 447 the duration of his hospital admissions after isolating another multidrug-resistant organism, though  
 448 was required to use shared bathroom facilities with patients in the adjacent room. Having required  
 449 treatment with meropenem for both hospital-acquired pneumonia and a surgical wound infection,  
 450 patient 22 was later diagnosed with a KPC-producing *K. pneumoniae* indwelling catheter-associated  
 451 urinary infection in January 2014. Twelve days later, patient 23 was subsequently found to have a  
 452 polymicrobial sacral wound infection, with cultures including KPC-producing *K. pneumoniae* from  
 453 sacral tissue. In response to this, all patients on the ward who had been admitted to the same room  
 454 and/or shared bathroom facilities with patients 22 and 23 were screened, with the subsequent  
 455 identification of patient 24. Alerts were placed on the records of patients meeting the criteria who had  
 456 been previously discharged. Environmental screening of the rooms and bathrooms was conducted,  
 457 with no KPC-producing organisms identified, and extended bleach cleaning with changes of curtains,  
 458 chairs and other furnishings was conducted for the entire ward.

459

460 Patient 33 was also admitted to Ward 1 in Facility A in February 2014, subsequent to the  
 461 identification of KPC-2 in patients 22, 23 and 24. This patient was not screened as he had not been  
 462 admitted to the same room, nor had he shared a bathroom with the identified cases. He also reported  
 463 no recent history of overseas travel. However, he was identified in July 2014 through routine  
 464 screening at Facility A following transfer from Ward 3, Facility U, located 25 km away. A KPC-  
 465 producing isolate from Patient 39 was identified in September 2014, and although the isolate  
 466 genomically clustered with isolates from Patients 22, 23, 24 and 33 identified at Facility A, she had no  
 467 previous presentations to that healthcare facility. However, immediately prior to identification of  
 468 KPC, she had also been in Facility U on Ward 3, though she was admitted there 13 days after Patient  
 469 33's discharge. Given this was the only plausible epidemiological link to the other cluster C patients,  
 470 secondary transmission was presumed to have occurred in Ward 3, Facility U.

471



472 Combining epidemiological and genomic data also revealed secondary transmission events,  
473 where patients with undetected colonisation at one hospital were transferred to a second  
474 healthcare service, with subsequent diagnosis and onwards transmission. Patients whose  
475 isolates were phylogenetically clustered with other isolates from a known transmission  
476 network, but who had not previously been admitted to the hospital where transmission was  
477 occurring, were flagged as potentially having acquired KPC through a secondary  
478 transmission event. Through this, two putative secondary transmission events were later  
479 identified from these main transmission networks (see example case study in Fig 5).

480

#### 481 **Bayesian evolutionary and transmission analysis**

482 Although from the combined genomic and epidemiological analyses, it appeared that local  
483 transmission within separate hospitals was driving the outbreak, local isolates from each  
484 cluster were closer to other local isolates (median pairwise SNP distance = 16; IQR 9-38)  
485 than to international ST258 isolates from GenBank (median pairwise SNP distance = 243;  
486 IQR 80-258). To investigate the possibility of initial inter-hospital transmission leading to  
487 subsequent transmission networks within each hospital, we explored whether Bayesian  
488 evolutionary and transmission modelling could be used to provide additional insight.

489

490 From these analyses, genomic clusters A and C each appeared to be derived from separate  
491 overseas importations of KPC-producing *K. pneumoniae* with subsequent spread within a  
492 single hospital or healthcare network rather than inter-hospital transmission, with a most  
493 recent common ancestor (MRCA) predicted to have occurred prior to 2010 (median 2007.78;  
494 95% HPD 2003.30–2011.09) when the first KPC-producing organism was reported in  
495 Australia [19], and 2012, when the first KPC-producing organism was reported in Victoria  
496 [12] (Fig 6). Similarly, the unclustered isolates represented separate individual importations

497 in these analyses, supporting the known history of recent overseas travel for these patients  
498 (Supplementary Table S5).

499

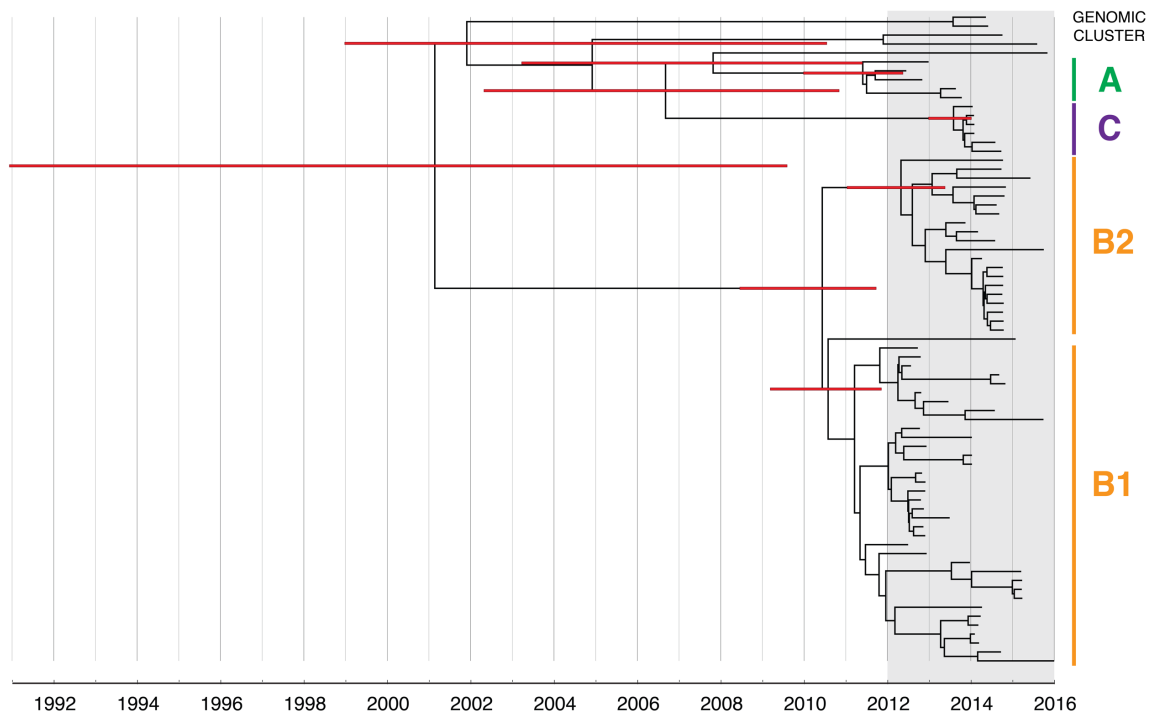

500

501 **Fig 6: Bayesian evolutionary analysis indicates each of the phylogenetic clades corresponding to**  
502 **the genomic clusters emerged prior to the detection of KPC in Victoria.**

503 A maximum clade credibility timed phylogeny from Bayesian evolutionary analysis of local CC258 *K.*  
504 *pneumoniae* isolate genomes is shown, with median node heights displayed. The thin red bars indicate  
505 95% highest posterior density (HPD) intervals for the most recent common ancestor (MRCA) for major  
506 clades and defined genomic clusters (indicated on the right). The shaded grey region indicates the recent  
507 period when KPC isolates were detected in Victoria.

508

509

510 Cluster B likely arose from another overseas importation (MRCA cluster A and B: median  
511 2002.52; 95% HPD 1991.72–2008.79), though the timed phylogeny (Fig 6) suggested strains  
512 of KPC-producing *K. pneumoniae* from cluster B may have been circulating in Victoria since  
513 2011 (MRCA cluster B1 and B2: median 2010.59; 95% HPD 2008.67–2011.86). A number  
514 of internal nodes within cluster B1 were dated to 2012 (Supplementary Fig S8),  
515 corresponding with overlapping patient admissions at Facility F at that time, which affirmed

516 the putative transmission network in Facility F in 2012. In both clusters B1 and B2, many  
517 isolates were linked by transmission events that were predicted to have occurred during 2013,  
518 despite a decline in new cases detected during this period. Notably, many of the isolates  
519 derived from these transmission events were not detected until later, in 2014 or 2015. This  
520 supported the epidemiological hypothesis that detection of previously unrecognised  
521 colonisation was driving a large proportion of the new cases in 2014 and 2015, rather than  
522 new transmission events (Fig 7). For each of the suspected transmission networks identified  
523 in the combined outbreak investigation, posterior probability distributions for the MRCA  
524 were generally consistent with the epidemiological data (Supplementary Fig S8).  
525

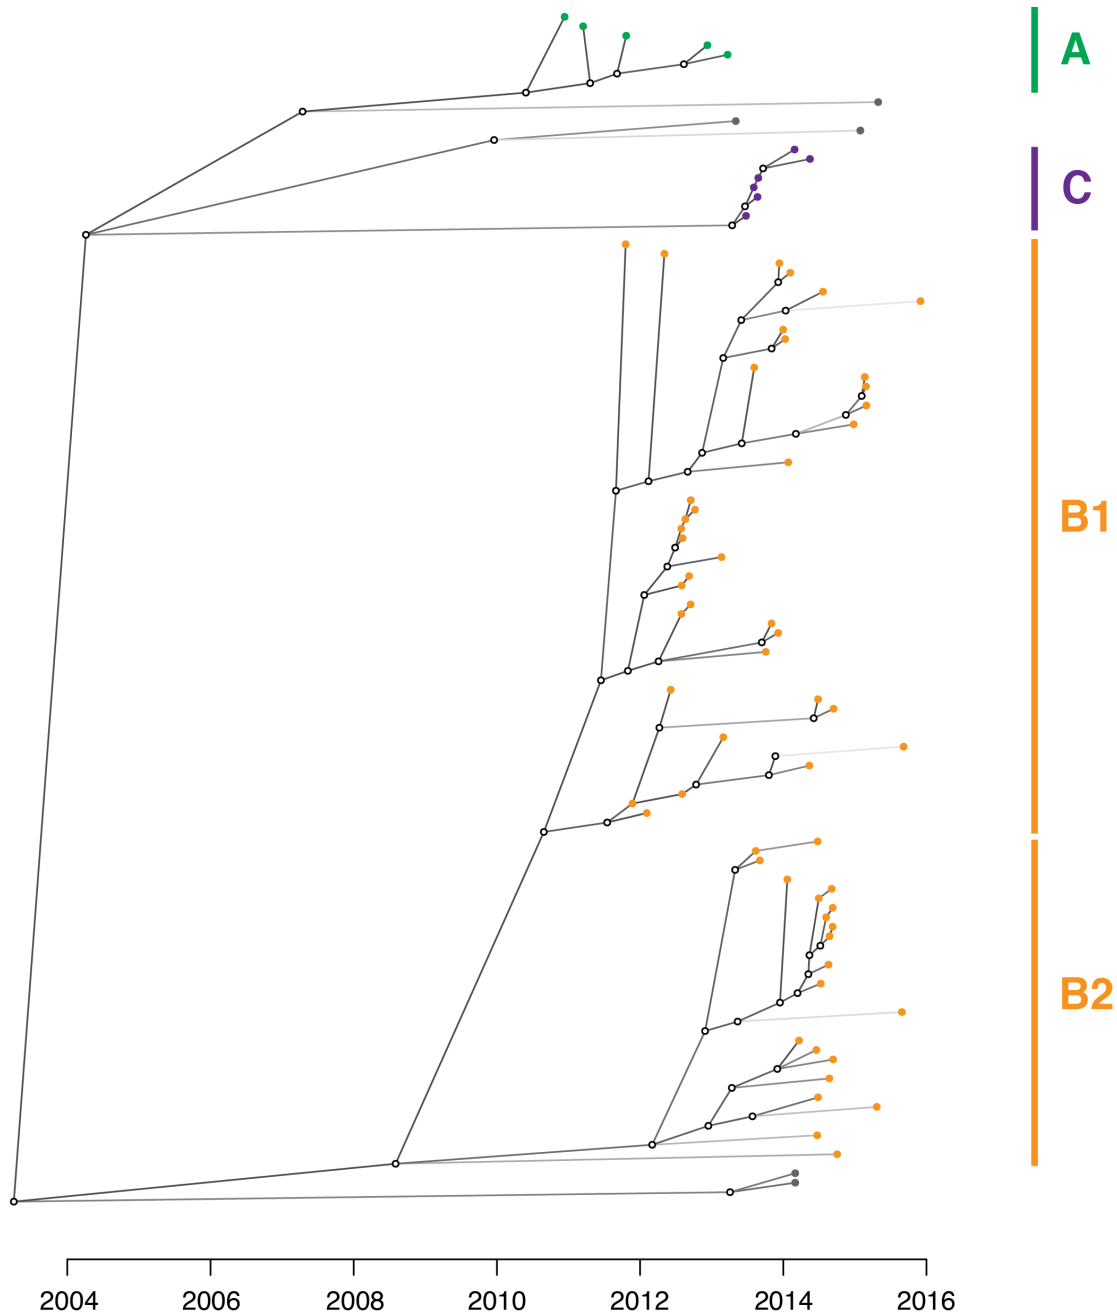

526

527 **Fig 7: An inferred transmission tree shows that undetected colonisation was significant in**  
528 **propagating the outbreak.**

529 Solid nodes represent the posterior mean time of KPC acquisition by individuals and are coloured by  
530 the corresponding genomic cluster, with empty circles representing inferred unsampled individuals  
531 contributing to the transmission tree. Branches are shaded by number of missing links in the  
532 transmission tree, with lighter branches representing increasing numbers of missing links implicated.

533

534

535 From the *TransPhylo* analysis, the mean reproductive number ( $R_0$ ) across the outbreak was  
536 calculated to be 1.63 (SD = 0.13), accounting for an average estimated sampling proportion  
537 of 0.27 (SD = 0.05).

538

### 539 **Plasmid analysis**

540 In late 2015, other Enterobacteriaceae carrying *bla*<sub>KPC-2</sub> were detected, including *Citrobacter*  
541 *farmeri*, *Citrobacter freundii*, and *Klebsiella oxytoca* (Fig 1), which raised concern about  
542 KPC-plasmid spread. Analysis of the *de novo* assembled draft genomes indicated the *bla*<sub>KPC-2</sub>  
543 carrying plasmids in these organisms matched a *bla*<sub>KPC-2</sub> carrying plasmid found in the  
544 locally circulating *K. pneumoniae* isolates, suggesting inter-species plasmid movement, and  
545 subsequent organism transmission. All *K. pneumoniae* ST258 isolates were found to harbour  
546 *bla*<sub>KPC-2</sub> within the “a” isoform of the characteristic Tn4401 transposon, and usually on a  
547 contig containing an IncFIB(pQil)-type plasmid replicon. However, cluster C isolates lacked  
548 the pQil-type plasmid, and instead carried *bla*<sub>KPC-2</sub> on an IncFIB(K)-type plasmid, while a  
549 few isolates within clusters B1 also lacked the pQil-type plasmid and probably carried *bla*<sub>KPC-</sub>  
550 <sub>2</sub> on a X3-type plasmid, though the assemblies were inadequate to confirm this. Surprisingly,  
551 one *K. pneumoniae* isolate cluster B1 that underwent PacBio sequencing was found to  
552 harbour both IncFIB(pQil) and IncFIB(K) plasmids, as did several other *K. pneumoniae*  
553 isolates based on replicons identified from their assemblies of Illumina sequencing data,  
554 though there was no prior contact identified between patients harbouring these isolates and  
555 cluster C patients. Chromosomal integration of the Tn4401 within the putative diguanylate  
556 cyclase gene, *ycdT*, was found in two epidemiologically linked ST258 *K. pneumoniae*  
557 isolates. One ST258 *K. pneumoniae* isolate lacked *bla*<sub>KPC-2</sub>, and subsequent repeat  
558 susceptibility testing confirmed the isolate to be susceptible to carbapenems. Re-testing of 10  
559 colonies subcultured from the stored glycerol stock for that patient sample found only 7/10

560 displayed carbapenemase hydrolytic activity with the CarbaNP test, indicating *in vivo* or *in*  
561 *vitro* loss of the *bla*<sub>KPC</sub> gene.

562

563 One *C. farmeri* isolate also underwent PacBio sequencing. Sequence comparisons between  
564 the KPC-plasmid genome from this isolate and the KPC-plasmid genome from a *K.*  
565 *pneumoniae* isolate indicated almost identical plasmids. The *C. farmeri* plasmid carried an  
566 IncR-type replicon and lacked a Type I restriction modification system, but otherwise  
567 comprised an identical sequence to 85% of the *K. pneumoniae* KPC plasmid following a  
568 recombination and inversion event (Fig 8). The *C. freundii* isolate was also found to have an  
569 IncR-type plasmid, but lacked other gene content found in the *C. farmeri* IncR plasmids,  
570 suggesting mobilisation of the Tn4401 transposon. The exact location of *bla*<sub>KPC-2</sub> and plasmid  
571 type of the *C. freundii* and *K. oxytoca* isolates were unable to be determined due to the  
572 limitations of the assembled short-read sequencing data.

573

574

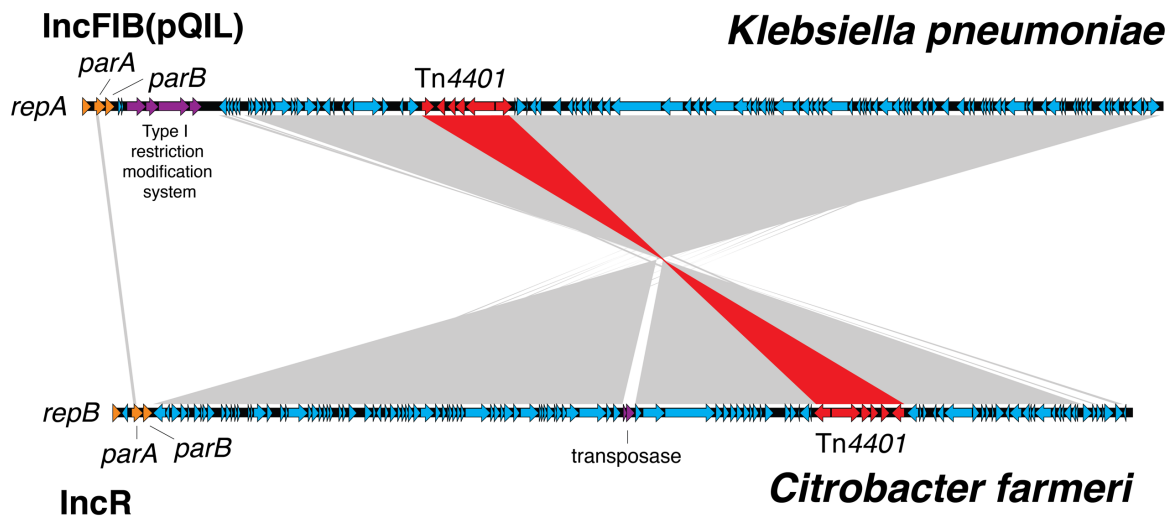

575

576 **Fig 8: KPC plasmids from the *C. farmeri* isolates were almost identical to KPC plasmids from *K.***  
577 ***pneumoniae* outbreak isolates, despite differing replication proteins.**

578 BLAST comparison between an IncFIB (pQIL-like) plasmid genome from a ST258 *Klebsiella*  
579 *pneumoniae* isolate, AUSMDU00008079 (above), and an IncR plasmid genome from a *Citrobacter*  
580 *farmeri* isolate, AUSMDU00008141 (below), from the outbreak. The grey shading indicates  
581 corresponding DNA regions of high nucleotide identity transcribed in opposing directions, with the  
582 Tn4401 transposon harbouring *bla<sub>KPC-2</sub>* highlighted in red. The plasmid genomes have been orientated  
583 to their respective replicons and downstream plasmid partitioning genes, *parA* and *parB*.

584

585

586

587 Phylogenetic analysis of the *C. farmeri* isolates inferred from core genome (chromosomal)

588 SNPs confirmed the isolates were closely related (Supplementary Fig S9).

589

### 590 **Within-host diversity**

591 To assess the within-host genomic diversity of KPC-producing Enterobacteriaceae, the  
592 isolate genomes from 17 patients who had multiple isolates obtained and sequenced were

593 compared. Of these, one patient had 32 isolates collected from seven samples over an 8-

594 month period from February 2016 to October 2016, including multiple colony sampling from

595 two faecal samples. The other 16 patients had multiple (median = 2; range 2-4) isolates  
596 referred to MDU, obtained through recurrent presentations at different healthcare facilities.  
597  
598 Genomic comparisons indicated isolates from the same patient differed by up to 21 SNPs in  
599 the core genome. This included the 32 isolates obtained from patient 70, with several internal  
600 lineages emerging from the same common ancestor within that individual (Fig 9).  
601 Pangenome analyses of these isolates also demonstrated changes in the accessory genome  
602 correlating with the emerging internal lineages in the core genome (chromosomal)  
603 phylogeny, and lineage-specific plasmid carriage. There was a poor molecular clock signal  
604 for these isolates (root-to-tip divergence  $R^2 = 0.026$ ), and no further temporal analyses were  
605 undertaken.



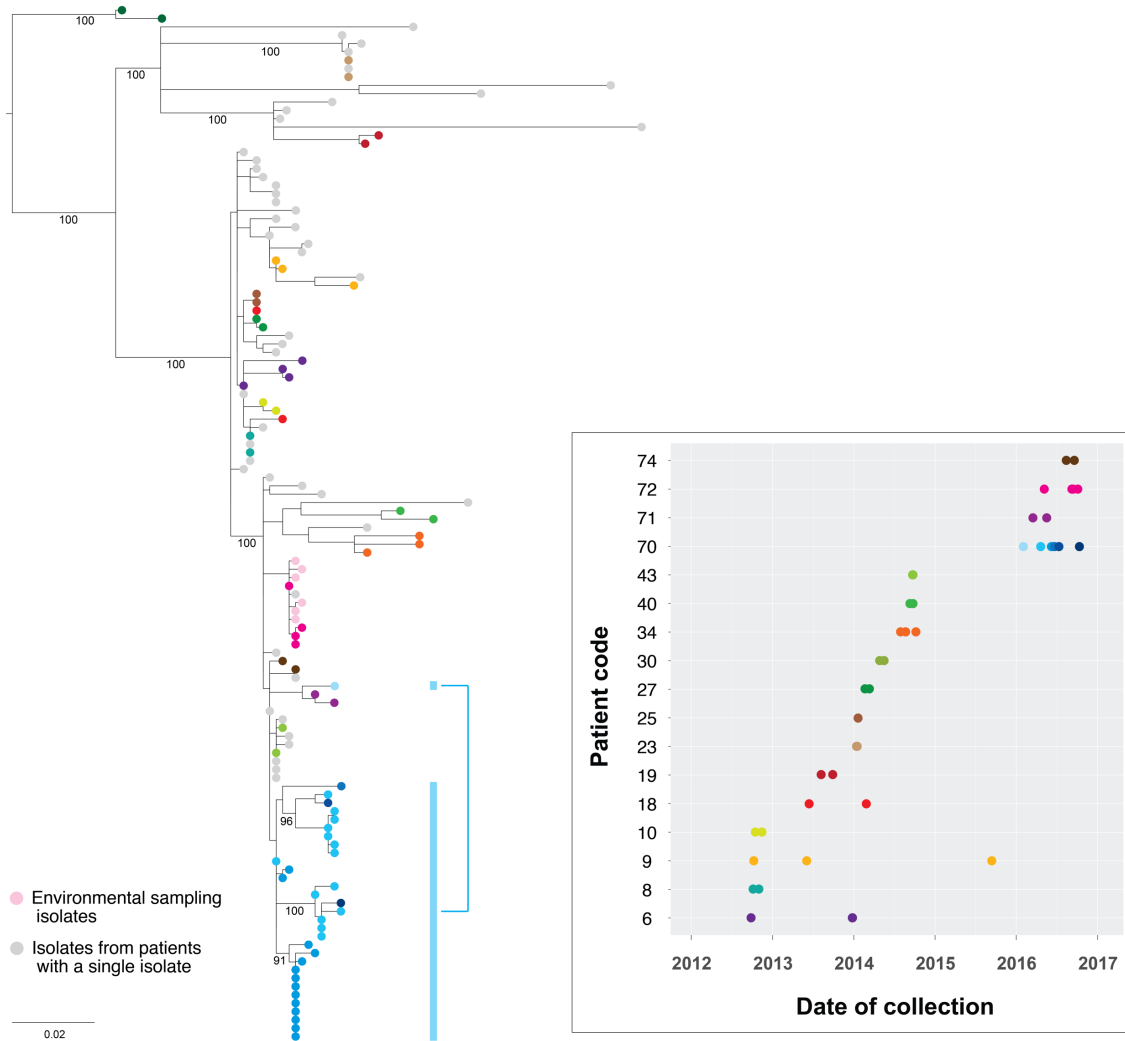

606

607 **Fig 9: Genomes of isolates from the same host group together in the phylogeny.**

608 Maximum likelihood tree of the study isolates with additional isolates obtained up to 1 November 2016  
609 included. Multiple isolates from the same patient have been coloured by patient, with the accompanying  
610 graph indicating the collection dates for the corresponding isolates. Thirty-two isolates from six clinical  
611 samples obtained from patient 70 (blue) over 8 months have been highlighted to illustrate the within-  
612 host lineages emerging in this patient. Bootstrap values (%) from 1000 replicates have been displayed  
613 for major branches in the tree.

614

615

616 When compared to other outbreak isolates, multiple isolates from the same host clustered  
617 together within a single subclade in the phylogenetic tree. This supported the concept of a  
618 “transmission bottleneck”, where despite an assumed diverse within-host population of KPC-  
619 producing Enterobacteriaceae, transmission only involved a single isolate, with subsequent  
620 within-host evolution following the initial transmission event. This also suggested multiple  
621 acquisitions of different strains of KPC-producing *K. pneumoniae* by the same patient were  
622 uncommon among the patient cohort. Of patients with multiple isolates spanning a six-month  
623 period, only patients 18 and 70 appeared to have isolates from differing subclades, though  
624 bootstrap branch support for these subclades was marginal (0.70-0.75).

625

#### 626 **Infection control investigation**

627 Qualitative interviews were conducted with infection control practitioners at three facilities  
628 regarding five transmission networks (four primary clusters of KPC-producing ST258 *K.*  
629 *pneumoniae* including two secondary transmission events at different locations, in addition to  
630 one cluster of KPC-producing *C. farmeri*) of suspected local transmission involving 17  
631 patients. The majority of transmission events were thought to have occurred due to  
632 unrecognised colonisation, and prior to the implementation of contact precautions – single  
633 room isolation with *en-suite* bathroom, with requirements for use of personal protective  
634 equipment (gloves and gown) by staff and visitors entering the room. However, two instances  
635 of apparent transmission to and from patients under contact precautions were reported. In  
636 each of these situations, after being admitted directly into contact precautions due to known  
637 colonisation with other multidrug-resistant organisms, a patient acquired a KPC-producing *K.*  
638 *pneumoniae* isolate that was highly related to other isolates in a genomic cluster (<5 SNPs in  
639 the core genome).

640

641 Due to the lack of local guidelines at the time of the outbreak, the management of wards  
642 where transmission was found to have occurred was at the discretion of the individual  
643 healthcare facilities involved. A retrospective review of the methods used to interrupt  
644 transmission identified a number of bundled approaches, with the common measures being  
645 contact screening, enhanced cleaning (in contrast to standard cleaning), and isolation of  
646 identified cases under contact precautions (Supplementary Table S6).

647

648 **Impact of whole-genome sequencing on the outbreak investigation and development of**  
649 **local containment guidelines**

650 In response to the genomic and epidemiological evidence of an evolving outbreak with local  
651 transmission, a state-wide management guideline was developed for the surveillance and  
652 containment of carbapenemase-producing Enterobacteriaceae incorporating the routine use of  
653 WGS to determine relatedness between isolates [56].

654

655 Several insights were gleaned through the use of genomics that were fundamental to the  
656 outbreak investigation and informed development of the guidelines and their focus on  
657 hospitals. For example, through the epidemiological investigation, the identification of KPC  
658 in previously hospitalised patients suggested nosocomial rather than community  
659 transmission, though which hospital transmission was occurring within was not immediately  
660 clear, given the number of hospitals and prior overlapping hospitalisations involved. The  
661 resolution of the genomic data refined epidemiological hypotheses to pinpoint transmission  
662 areas in individual hospitals to focus infection control efforts, with Bayesian analyses of the  
663 genomic data also supporting the epidemiological findings. By determining when and where  
664 transmission was occurring, it was evident that many new cases were readmissions of  
665 patients with previously unrecognised colonisation, rather than new transmission events,

666 making it difficult to “control” the outbreak. This highlighted the need to intensively screen  
667 at-risk patient contacts, including flagging those that had been discharged from an affected  
668 ward prior to recognition of transmission for screening and pre-emptive isolation upon  
669 subsequent hospital presentations. This real-time change-in-practice was reflected by the  
670 increasing proportion of cases identified as “colonisations” rather than “infections” due to  
671 intensified screening practices over time (Supplementary Fig S5).

672

673

674 **DISCUSSION**

675 The emergence of carbapenemase producing Enterobacteriaceae (CPE) is a major threat to  
676 human health [1, 5, 57], with significant interventions required at state and national levels to  
677 contain the spread once established [58]. Here, we describe the largest outbreak of CPE  
678 reported in Australia, and demonstrate how a combined genomics and epidemiological  
679 investigation delineated the outbreak into five separate nosocomial transmission networks  
680 (four clusters of *K. pneumoniae* and one cluster of *C. farmeri*) across the state over four  
681 years, resulting in targeted interventions for each transmission area. The use of WGS for  
682 outbreak analysis has been well established, including for transmission of multidrug resistant  
683 hospital pathogens [27, 59], but these studies have been predominantly small scale, single  
684 institution studies, and often retrospective. Genomics has rarely been used prospectively and  
685 in real-time during a complex multi-institutional outbreak requiring a coordinated state-wide  
686 public health response. Due to prolonged colonisation, many CPE cases linked to hospitals  
687 with suspected transmission were identified through other healthcare facilities, and some  
688 through general practice. With the number of potential transmission opportunities in  
689 retrospective hospitalisation data from all facilities, the epidemiological investigation would  
690 have been difficult to interpret and translate into focussed interventions without the resolution  
691 offered by genomics. Similarly, accurate interpretation of the genomic data would have been  
692 difficult without the supporting epidemiologic data. As others have pointed out, the two must  
693 go hand-in-hand [60]. By integrating our detailed epidemiological investigation with genomic  
694 analyses, we were able to refine our hypotheses, and coordinate an effective public health  
695 response to target areas with ongoing transmission, emphasising the ability of WGS to  
696 enhance surveillance systems and outbreak investigations.

697

718 Despite integrating genomic data with detailed epidemiological information, we still  
719 encountered several challenges. Accurate inference of plasmid transmission can be  
720 challenging from short-read Illumina sequencing data, with repetitive elements such as  
721 insertion sequences that accompany mobile resistance elements frequently confounding  
722 short-read assemblers and read-mappers [61]. As we demonstrated here and as reported by  
723 others [61], long-read sequencing technology such as Pacific Biosciences single-molecule  
724 sequencing can be highly useful in resolving and tracking the diversity of plasmids carrying  
725 carbapenemases and other resistance genes, although we could only sequence a limited  
726 representation of the outbreak isolates due to cost limitations. The data gained from these  
727 completed genomes were invaluable. The use of a local internal reference provided additional  
728 confidence in SNP calling among highly clonal isolates. We were able to compare  
729 completely assembled plasmids between different species, which otherwise would not have  
730 been possible. Many isolates in the outbreak carried *bla*<sub>KPC-2</sub> on either an IncFIB(K) or  
731 IncFIB(pQil) plasmid, with long-read sequencing showing it was possible for a patient to be  
732 colonised with an isolate carrying multiple plasmids of the same incompatibility group. As  
733 we found in two isolates and as others have recently reported [62], chromosomal integration  
734 of *Tn4401* also occasionally occurs. The movement of these resistance elements adds  
735 complexity to understanding transmission dynamics using genomics, and highlights the  
736 limitations of short-read sequencing data.

717

718 It is increasingly evident that the subtly diverse populations of a single clonal type due to  
719 within-host evolution [63], and more diverse populations from transmission of mixed  
720 infections [64, 65], can impair accurate reconstruction of transmission pathways from  
721 genomic data [66]. In our study, we found some individuals not only had different plasmid  
722 variants, but also had distinct within-host evolutionary lineages, indicating a complex

723 evolutionary history of transmission, within-host evolution, and plasmid movement,  
724 mirroring recent reports in other patients with prolonged KPC colonisation [67]. However,  
725 measuring this diversity is difficult in outbreak investigations. Although single-colony  
726 sampling and sequencing arguably provides the most informative data, it may be subject to  
727 colony selection bias, so some uncertainty remains. This can be offset by sampling more  
728 colonies, but the time and cost of sequencing each colony can quickly become prohibitive in  
729 an outbreak investigation and real-world public health environment. Although some have  
730 attempted to detect the presence of mixed infections in short-read datasets through analysis of  
731 short-read mapping from deep sequencing [64], this relies on WGS performed on a sweep of  
732 a primary culture plate, introducing the potential for exogenous DNA in the dataset, and  
733 becomes considerably more complicated with fluxes in accessory genome content. As we  
734 found, *bla*<sub>KPC</sub>-plasmids can be lost even through laboratory passage of stored isolates. Even if  
735 the within-host genomic diversity can be captured, incorporating these data into models can  
736 be difficult. Recent attempts to account for elements such as within-host diversity and  
737 unsampled data in reconstructing transmission trees have proved successful in some  
738 situations [52, 68-70]. However, each of these make several assumptions, such as the  
739 presence of a complete transmission bottleneck that does not allow for repeated acquisition, a  
740 constant reproduction number across the outbreak, few or no unsampled cases, and that  
741 genetic variation is accumulated in pathogens in a clock-like fashion. The within-host  
742 diversity and horizontal transmission of mobile genetic elements in outbreak investigations  
743 complicates analyses further, and consequently, accurate reconstruction of exact transmission  
744 routes remains difficult for large and moderate-sized CPE outbreaks.

745

746 Our study has some limitations and points of note. Firstly, although most patient isolates had  
747 a clear epidemiological link to other isolates within the defined genomic clusters, not every

748 isolate was able to be linked to another patient with KPC or a history of recent overseas  
749 travel, indicating a larger pool of unrecognised colonisation, though influenced in part by  
750 differing stringency in contact screening and data collection. For example, no patient in  
751 cluster A reported overseas travel since 1996, when KPC was first detected. Furthermore,  
752 although these patients were located at healthcare facilities in the same geographical region  
753 of Victoria and part of the same healthcare service, they did not have any overlapping  
754 inpatient admissions. Thus, it is likely that there are other individuals or environmental  
755 sources that serve as intermediary reservoirs of isolates not captured in our sampling, that  
756 facilitate ongoing transmission. Although environmental and contact screening was initially  
757 performed using methods published by others [71], based on our data, the optimal approaches  
758 are still not well understood. Secondly, although the outbreak has slowed, cases are still  
759 emerging despite the extensive investigation and interventions implemented by the individual  
760 healthcare services. However, as shown in our analyses, many of these may be unrecognised  
761 colonisation following previous exposure rather than new transmission events. As a result of  
762 this knowledge, through the development of our guidelines, we have redirected infection  
763 control resources into intensive screening to identify individuals with asymptomatic  
764 colonisation, focussing efforts on healthcare facilities with ongoing transmission.

765

766 Our study reports a real-world prospective utilisation of WGS, including the difficulties  
767 encountered, to enhance a complex epidemiological investigation in real-time for an  
768 important pathogen. In contrast to most reported outbreaks of CPE within a single institution,  
769 our outbreak demanded a coordinated public health response. Previously the domain and  
770 responsibility of individual hospitals and healthcare facilities, the spread of CPE has become  
771 a public health issue. Through our experience, WGS has since been incorporated into our  
772 state guidelines for the management of CPE [56]. Developed during the outbreak



773 investigation, this system entails routine WGS of all suspected CPE isolates with concurrent  
774 epidemiological investigation to allow prospective, centralised comparison of isolates and  
775 epidemiological data from multiple health services. In turn, this enables identification of  
776 potential transmission events between patients geographically and temporally dispersed at  
777 identification, translating into focussed interventions at the designated transmission locations.  
778 For such extensively drug-resistant organisms with limited treatment options, all feasible  
779 interventions towards reducing the early burden of disease are warranted.

780

781

## 782 **FUNDING STATEMENT**

783 MDU PHL is funded by the Victorian Government, Australia. JCK (GNT1074824), NLS  
784 (GNT1093468), TPS (GNT1105525) and BPH (GNT1105905) are supported by the National  
785 Health and Medical Research Council (NHMRC) of Australia. SLB is supported by an  
786 Australian Postgraduate Award. JCK, SLB and NLS are also supported by Australian  
787 Government Research Training Program Scholarships.

788

789 The funders had no role in study design, data collection and analysis, decision to publish, or  
790 preparation of the manuscript.

791

## 792 REFERENCES

793

- 794 1. Centers for Disease Control and Prevention, US Department of Health and Human Services.  
795 Antibiotic resistance threats in the United States, 2013. 2013. Available from:  
796 <https://www.cdc.gov/drugresistance/threat-report-2013/index.html>
- 797 2. Queenan AM, Bush K. Carbapenemases: the versatile beta-lactamases. *Clin Microbiol Rev.*  
798 2007;20(3):440-58, table of contents. doi: 10.1128/CMR.00001-07. PubMed PMID:  
799 17630334; PubMed Central PMCID: PMC1932750.
- 800 3. Falagas ME, Lourida P, Poulidakos P, Rafailidis PI, Tansarli GS. Antibiotic treatment of  
801 infections due to carbapenem-resistant Enterobacteriaceae: systematic evaluation of the  
802 available evidence. *Antimicrob Agents Chemother.* 2014;58(2):654-63. doi:  
803 10.1128/AAC.01222-13. PubMed PMID: 24080646; PubMed Central PMCID:  
804 PMC3910850.
- 805 4. Tzouvelekis LS, Markogiannakis A, Psychogiou M, Tassios PT, Daikos GL. Carbapenemases  
806 in *Klebsiella pneumoniae* and other Enterobacteriaceae: an evolving crisis of global  
807 dimensions. *Clin Microbiol Rev.* 2012;25(4):682-707. doi: 10.1128/CMR.05035-11. PubMed  
808 PMID: 23034326; PubMed Central PMCID: PMC3485753.
- 809 5. Australian Commission on Safety and Quality in Health Care. Recommendations for the  
810 control of multi-drug resistant Gram-negatives: carbapenem resistant Enterobacteriaceae.  
811 Sydney: Australian Commission on Safety and Quality in Health Care, 2013. Available from:  
812 <https://www.safetyandquality.gov.au/publications/mrgn-guidelines-enterobacteriaceae/>
- 813 6. Australian Group on Antimicrobial Resistance. The evolution of carbapenemases in  
814 Enterobacteriaceae in Australia. 2014. Available from:  
815 [http://www.agargroup.org/files/AGAR\\_Carbapenemase\\_evolution\\_JTv24.pdf](http://www.agargroup.org/files/AGAR_Carbapenemase_evolution_JTv24.pdf)
- 816 7. Espedido BA, Steen JA, Ziochos H, Grimmond SM, Cooper MA, Gosbell IB, et al. Whole  
817 genome sequence analysis of the first Australian OXA-48-producing outbreak-associated  
818 *Klebsiella pneumoniae* isolates: the resistome and in vivo evolution. *PLoS One.*

- 819 2013;8(3):e59920. doi: 10.1371/journal.pone.0059920. PubMed PMID: 23555831; PubMed  
820 Central PMCID: PMC3612081.
- 821 8. Kotsanas D, Wijesooriya WR, Korman TM, Gillespie EE, Wright L, Snook K, et al. "Down  
822 the drain": carbapenem-resistant bacteria in intensive care unit patients and handwashing  
823 sinks. *Med J Aust.* 2013;198(5):267-9. PubMed PMID: 23496403.
- 824 9. Peleg AY, Franklin C, Bell JM, Spelman DW. Dissemination of the metallo-beta-lactamase  
825 gene blaIMP-4 among gram-negative pathogens in a clinical setting in Australia. *Clin Infect  
826 Dis.* 2005;41(11):1549-56. doi: 10.1086/497831. PubMed PMID: 16267725.
- 827 10. Tai AY, Stuart RL, Sidjabat HE, Lemoh CN, Rogers BA, Graham M, et al. Local acquisition  
828 and nosocomial transmission of *Klebsiella pneumoniae* harbouring the blaNDM-1 gene in  
829 Australia. *Med J Aust.* 2015;202(5):270-2. PubMed PMID: 25758700.
- 830 11. Chang LW, Buising KL, Jeremiah CJ, Cronin K, Poy Lorenzo YS, Howden BP, et al.  
831 Managing a nosocomial outbreak of carbapenem-resistant *Klebsiella pneumoniae*: an early  
832 Australian hospital experience. *Intern Med J.* 2015;45(10):1037-43. doi: 10.1111/imj.12863.  
833 PubMed PMID: 26178306.
- 834 12. Chua KY, Grayson ML, Burgess AN, Lee JY, Howden BP. The growing burden of  
835 multidrug-resistant infections among returned Australian travellers. *Med J Aust.*  
836 2014;200(2):116-8. PubMed PMID: 24484117.
- 837 13. Fernando GA, Collignon PJ, Bell JM. A risk for returned travellers: the "post-antibiotic era".  
838 *Med J Aust.* 2010;193(1):59. PubMed PMID: 20618119.
- 839 14. Poirel L, Lagrutta E, Taylor P, Pham J, Nordmann P. Emergence of metallo-beta-lactamase  
840 NDM-1-producing multidrug-resistant *Escherichia coli* in Australia. *Antimicrob Agents  
841 Chemother.* 2010;54(11):4914-6. doi: 10.1128/AAC.00878-10. PubMed PMID: 20823289;  
842 PubMed Central PMCID: PMC2976126.
- 843 15. Sidjabat H, Nimmo GR, Walsh TR, Binotto E, Htin A, Hayashi Y, et al. Carbapenem  
844 resistance in *Klebsiella pneumoniae* due to the New Delhi Metallo-beta-lactamase. *Clin Infect  
845 Dis.* 2011;52(4):481-4. doi: 10.1093/cid/ciq178. PubMed PMID: 21258100; PubMed Central  
846 PMCID: PMC3106237.

- 847 16. Sidjabat HE, Kennedy K, Silvey A, Collignon P, Paterson DL. Emergence of bla(OXA-181)-  
848 carrying ColE plasmid in *Klebsiella pneumoniae* in Australia. *Int J Antimicrob Agents*.  
849 2013;41(3):294-6. doi: 10.1016/j.ijantimicag.2012.11.003. PubMed PMID: 23313398.
- 850 17. Blyth CC, Pereira L, Goire N. New Delhi metallo-beta-lactamase-producing  
851 enterobacteriaceae in an Australian child who had not travelled overseas. *Med J Aust*.  
852 2014;200(7):386. PubMed PMID: 24794661.
- 853 18. Munoz-Price LS, Poirel L, Bonomo RA, Schwaber MJ, Daikos GL, Cormican M, et al.  
854 Clinical epidemiology of the global expansion of *Klebsiella pneumoniae* carbapenemases.  
855 *Lancet Infect Dis*. 2013;13(9):785-96. doi: 10.1016/S1473-3099(13)70190-7. PubMed PMID:  
856 23969216; PubMed Central PMCID: PMC4673667.
- 857 19. Coatsworth NR, Huntington PG, Hardiman RP, Hudson BJ, Fernandes CJ. A case of  
858 carbapenemase-producing *Klebsiella pneumoniae* in Australia. *Pathology*. 2012;44(1):42-4.  
859 doi: 10.1097/PAT.0b013e32834e4228. PubMed PMID: 22157689.
- 860 20. Kwong JC, McCallum N, Sintchenko V, Howden BP. Whole genome sequencing in clinical  
861 and public health microbiology. *Pathology*. 2015;47(3):199-210. doi:  
862 10.1097/PAT.0000000000000235. PubMed PMID: 25730631; PubMed Central PMCID:  
863 PMC4389090.
- 864 21. Kwong JC, Mercoulia K, Tomita T, Easton M, Li HY, Bulach DM, et al. Prospective Whole-  
865 Genome Sequencing Enhances National Surveillance of *Listeria monocytogenes*. *J Clin*  
866 *Microbiol*. 2016;54(2):333-42. doi: 10.1128/JCM.02344-15. PubMed PMID: 26607978;  
867 PubMed Central PMCID: PMC4733179.
- 868 22. Jiang Y, Wei Z, Wang Y, Hua X, Feng Y, Yu Y. Tracking a hospital outbreak of KPC-  
869 producing ST11 *Klebsiella pneumoniae* with whole genome sequencing. *Clin Microbiol*  
870 *Infect*. 2015;21(11):1001-7. doi: 10.1016/j.cmi.2015.07.001. PubMed PMID: 26166545.
- 871 23. Kanamori H, Parobek CM, Juliano JJ, van Duin D, Cairns BA, Weber DJ, et al. A Prolonged  
872 Outbreak of KPC-3-Producing *Enterobacter cloacae* and *Klebsiella pneumoniae* Driven by  
873 Multiple Mechanisms of Resistance Transmission at a Large Academic Burn Center.

- 874 Antimicrob Agents Chemother. 2017;61(2). doi: 10.1128/AAC.01516-16. PubMed PMID:  
875 27919898; PubMed Central PMCID: PMC5278681.
- 876 24. Marsh JW, Krauland MG, Nelson JS, Schlackman JL, Brooks AM, Pasculle AW, et al.  
877 Genomic Epidemiology of an Endoscope-Associated Outbreak of *Klebsiella pneumoniae*  
878 Carbapenemase (KPC)-Producing *K. pneumoniae*. PLoS One. 2015;10(12):e0144310. doi:  
879 10.1371/journal.pone.0144310. PubMed PMID: 26637170; PubMed Central PMCID:  
880 PMC4670079.
- 881 25. Mathers AJ, Stoesser N, Sheppard AE, Pankhurst L, Giess A, Yeh AJ, et al. *Klebsiella*  
882 *pneumoniae* carbapenemase (KPC)-producing *K. pneumoniae* at a single institution: insights  
883 into endemicity from whole-genome sequencing. Antimicrob Agents Chemother.  
884 2015;59(3):1656-63. doi: 10.1128/AAC.04292-14. PubMed PMID: 25561339; PubMed  
885 Central PMCID: PMC4325807.
- 886 26. Ruppe E, Olearo F, Pires D, Baud D, Renzi G, Cherkaoui A, et al. Clonal or not clonal?  
887 Investigating hospital outbreaks of KPC-producing *Klebsiella pneumoniae* with whole-  
888 genome sequencing. Clin Microbiol Infect. 2017. doi: 10.1016/j.cmi.2017.01.015. PubMed  
889 PMID: 28143787.
- 890 27. Snitkin ES, Zelazny AM, Thomas PJ, Stock F, Group NCSP, Henderson DK, et al. Tracking a  
891 hospital outbreak of carbapenem-resistant *Klebsiella pneumoniae* with whole-genome  
892 sequencing. Sci Transl Med. 2012;4(148):148ra16. doi: 10.1126/scitranslmed.3004129.  
893 PubMed PMID: 22914622; PubMed Central PMCID: PMC3521604.
- 894 28. Weterings V, Zhou K, Rossen JW, van Stenis D, Thewessen E, Kluytmans J, et al. An  
895 outbreak of colistin-resistant *Klebsiella pneumoniae* carbapenemase-producing *Klebsiella*  
896 *pneumoniae* in the Netherlands (July to December 2013), with inter-institutional spread. Eur J  
897 Clin Microbiol Infect Dis. 2015;34(8):1647-55. doi: 10.1007/s10096-015-2401-2. PubMed  
898 PMID: 26067658.
- 899 29. Gilchrist CA, Turner SD, Riley MF, Petri WA, Jr., Hewlett EL. Whole-genome sequencing in  
900 outbreak analysis. Clin Microbiol Rev. 2015;28(3):541-63. doi: 10.1128/CMR.00075-13.  
901 PubMed PMID: 25876885; PubMed Central PMCID: PMC4399107.

- 902 30. Nordmann P, Poirel L, Dortet L. Rapid detection of carbapenemase-producing  
903 Enterobacteriaceae. *Emerg Infect Dis.* 2012;18(9):1503-7. doi: 10.3201/eid1809.120355.  
904 PubMed PMID: 22932472; PubMed Central PMCID: PMC3437707.
- 905 31. Tenover FC, Canton R, Kop J, Chan R, Ryan J, Weir F, et al. Detection of colonization by  
906 carbapenemase-producing Gram-negative Bacilli in patients by use of the Xpert MDRO  
907 assay. *J Clin Microbiol.* 2013;51(11):3780-7. doi: 10.1128/JCM.01092-13. PubMed PMID:  
908 24006011; PubMed Central PMCID: PMC3889767.
- 909 32. Carter GP, Buultjens AH, Ballard SA, Baines SL, Tomita T, Strachan J, et al. Emergence of  
910 endemic MLST non-typeable vancomycin-resistant *Enterococcus faecium*. *J Antimicrob*  
911 *Chemother.* 2016;71(12):3367-71. doi: 10.1093/jac/dkw314. PubMed PMID: 27530751.
- 912 33. Bolger AM, Lohse M, Usadel B. Trimmomatic: a flexible trimmer for Illumina sequence  
913 data. *Bioinformatics.* 2014;30(15):2114-20. doi: 10.1093/bioinformatics/btu170. PubMed  
914 PMID: 24695404; PubMed Central PMCID: PMC4103590.
- 915 34. Bankevich A, Nurk S, Antipov D, Gurevich AA, Dvorkin M, Kulikov AS, et al. SPAdes: a  
916 new genome assembly algorithm and its applications to single-cell sequencing. *J Comput*  
917 *Biol.* 2012;19(5):455-77. doi: 10.1089/cmb.2012.0021. PubMed PMID: 22506599; PubMed  
918 Central PMCID: PMC3342519.
- 919 35. Seemann T. Prokka: rapid prokaryotic genome annotation. *Bioinformatics.*  
920 2014;30(14):2068-9. doi: 10.1093/bioinformatics/btu153. PubMed PMID: 24642063.
- 921 36. Walker BJ, Abeel T, Shea T, Priest M, Abouelliel A, Sakthikumar S, et al. Pilon: an  
922 integrated tool for comprehensive microbial variant detection and genome assembly  
923 improvement. *PLoS One.* 2014;9(11):e112963. doi: 10.1371/journal.pone.0112963. PubMed  
924 PMID: 25409509; PubMed Central PMCID: PMC4237348.
- 925 37. Page AJ, Cummins CA, Hunt M, Wong VK, Reuter S, Holden MT, et al. Roary: rapid large-  
926 scale prokaryote pan genome analysis. *Bioinformatics.* 2015;31(22):3691-3. doi:  
927 10.1093/bioinformatics/btv421. PubMed PMID: 26198102; PubMed Central PMCID:  
928 PMC4817141.

- 929 38. Didelot X, Wilson DJ. ClonalFrameML: efficient inference of recombination in whole  
930 bacterial genomes. *PLoS Comput Biol*. 2015;11(2):e1004041. doi:  
931 10.1371/journal.pcbi.1004041. PubMed PMID: 25675341; PubMed Central PMCID:  
932 PMC4326465.
- 933 39. Page AJ, Taylor B, Delaney AJ, Soares J, Seemann T, Keane JA, et al. SNP-sites: rapid  
934 efficient extraction of SNPs from multi-FASTA alignments. *Microb Genom*.  
935 2016;2(4):e000056. doi: 10.1099/mgen.0.000056. PubMed PMID: 28348851; PubMed  
936 Central PMCID: PMC5320690.
- 937 40. Stamatakis A. RAxML version 8: a tool for phylogenetic analysis and post-analysis of large  
938 phylogenies. *Bioinformatics*. 2014;30(9):1312-3. doi: 10.1093/bioinformatics/btu033.  
939 PubMed PMID: 24451623; PubMed Central PMCID: PMC3998144.
- 940 41. Cheng L, Connor TR, Siren J, Aanensen DM, Corander J. Hierarchical and spatially explicit  
941 clustering of DNA sequences with BAPS software. *Mol Biol Evol*. 2013;30(5):1224-8. doi:  
942 10.1093/molbev/mst028. PubMed PMID: 23408797; PubMed Central PMCID:  
943 PMC3670731.
- 944 42. Chen L, Chavda KD, Mediavilla JR, Jacobs MR, Levi MH, Bonomo RA, et al. Partial  
945 excision of blaKPC from Tn4401 in carbapenem-resistant *Klebsiella pneumoniae*. *Antimicrob*  
946 *Agents Chemother*. 2012;56(3):1635-8. doi: 10.1128/AAC.06182-11. PubMed PMID:  
947 22203593; PubMed Central PMCID: PMC3294926.
- 948 43. Kitchel B, Rasheed JK, Patel JB, Srinivasan A, Navon-Venezia S, Carmeli Y, et al. Molecular  
949 epidemiology of KPC-producing *Klebsiella pneumoniae* isolates in the United States: clonal  
950 expansion of multilocus sequence type 258. *Antimicrob Agents Chemother*. 2009;53(8):3365-  
951 70. doi: 10.1128/AAC.00126-09. PubMed PMID: 19506063; PubMed Central PMCID:  
952 PMC2715580.
- 953 44. Naas T, Cuzon G, Truong HV, Nordmann P. Role of ISKpn7 and deletions in blaKPC gene  
954 expression. *Antimicrob Agents Chemother*. 2012;56(9):4753-9. doi: 10.1128/AAC.00334-12.  
955 PubMed PMID: 22733068; PubMed Central PMCID: PMC3421896.

- 956 45. Naas T, Cuzon G, Villegas MV, Lartigue MF, Quinn JP, Nordmann P. Genetic structures at  
957 the origin of acquisition of the beta-lactamase bla KPC gene. *Antimicrob Agents Chemother.*  
958 2008;52(4):1257-63. doi: 10.1128/AAC.01451-07. PubMed PMID: 18227185; PubMed  
959 Central PMCID: PMC2292522.
- 960 46. Camacho C, Coulouris G, Avagyan V, Ma N, Papadopoulos J, Bealer K, et al. BLAST+:  
961 architecture and applications. *BMC Bioinformatics.* 2009;10:421. doi: 10.1186/1471-2105-  
962 10-421. PubMed PMID: 20003500; PubMed Central PMCID: PMC2803857.
- 963 47. Carattoli A, Zankari E, Garcia-Fernandez A, Voldby Larsen M, Lund O, Villa L, et al. In  
964 silico detection and typing of plasmids using PlasmidFinder and plasmid multilocus sequence  
965 typing. *Antimicrob Agents Chemother.* 2014;58(7):3895-903. doi: 10.1128/AAC.02412-14.  
966 PubMed PMID: 24777092; PubMed Central PMCID: PMC4068535.
- 967 48. Bouckaert R, Heled J, Kuhnert D, Vaughan T, Wu CH, Xie D, et al. BEAST 2: a software  
968 platform for Bayesian evolutionary analysis. *PLoS Comput Biol.* 2014;10(4):e1003537. doi:  
969 10.1371/journal.pcbi.1003537. PubMed PMID: 24722319; PubMed Central PMCID:  
970 PMC3985171.
- 971 49. Rambaut A, Lam TT, Max Carvalho L, Pybus OG. Exploring the temporal structure of  
972 heterochronous sequences using TempEst (formerly Path-O-Gen). *Virus Evol.*  
973 2016;2(1):vew007. doi: 10.1093/ve/vew007. PubMed PMID: 27774300; PubMed Central  
974 PMCID: PMC4989882.
- 975 50. Drummond AJ, Ho SY, Phillips MJ, Rambaut A. Relaxed phylogenetics and dating with  
976 confidence. *PLoS Biol.* 2006;4(5):e88. doi: 10.1371/journal.pbio.0040088. PubMed PMID:  
977 16683862; PubMed Central PMCID: PMC1395354.
- 978 51. Hasegawa M, Kishino H, Yano T. Dating of the human-ape splitting by a molecular clock of  
979 mitochondrial DNA. *J Mol Evol.* 1985;22(2):160-74. PubMed PMID: 3934395.
- 980 52. Didelot X, Fraser C, Gardy J, Colijn C. Genomic Infectious Disease Epidemiology in  
981 Partially Sampled and Ongoing Outbreaks. *Mol Biol Evol.* 2017;34(4):997-1007. doi:  
982 10.1093/molbev/msw275. PubMed PMID: 28100788.



- 983 53. Zimmerman FS, Assous MV, Bdolah-Abram T, Lachish T, Yinnon AM, Wiener-Well Y.  
984 Duration of carriage of carbapenem-resistant Enterobacteriaceae following hospital discharge.  
985 Am J Infect Control. 2013;41(3):190-4. doi: 10.1016/j.ajic.2012.09.020. PubMed PMID:  
986 23449280.
- 987 54. Price MN, Dehal PS, Arkin AP. FastTree 2--approximately maximum-likelihood trees for  
988 large alignments. PLoS One. 2010;5(3):e9490. doi: 10.1371/journal.pone.0009490. PubMed  
989 PMID: 20224823; PubMed Central PMCID: PMC2835736.
- 990 55. Deleo FR, Chen L, Porcella SF, Martens CA, Kobayashi SD, Porter AR, et al. Molecular  
991 dissection of the evolution of carbapenem-resistant multilocus sequence type 258 *Klebsiella*  
992 *pneumoniae*. Proc Natl Acad Sci U S A. 2014;111(13):4988-93. doi:  
993 10.1073/pnas.1321364111. PubMed PMID: 24639510; PubMed Central PMCID:  
994 PMC3977278.
- 995 56. Department of Health & Human Services, Victoria State Government. Victorian guidelines  
996 on carbapenemase-producing Enterobacteriaceae. Melbourne: Victoria State Government,  
997 2015. Available from:  
998 [https://www2.health.vic.gov.au/about/publications/policiesandguidelines/carbapenemase-](https://www2.health.vic.gov.au/about/publications/policiesandguidelines/carbapenemase-producing-enterobacteriaceae-guidelines)  
999 [producing-enterobacteriaceae-guidelines](https://www2.health.vic.gov.au/about/publications/policiesandguidelines/carbapenemase-producing-enterobacteriaceae-guidelines)
- 1000 57. World Health Organization. Antimicrobial resistance: global report on surveillance. 2014.  
1001 Available from: <http://www.who.int/drugresistance/documents/surveillancereport/en/>
- 1002 58. Schwaber MJ, Carmeli Y. An ongoing national intervention to contain the spread of  
1003 carbapenem-resistant enterobacteriaceae. Clin Infect Dis. 2014;58(5):697-703. doi:  
1004 10.1093/cid/cit795. PubMed PMID: 24304707.
- 1005 59. Palmore TN, Henderson DK. Managing transmission of carbapenem-resistant  
1006 enterobacteriaceae in healthcare settings: a view from the trenches. Clin Infect Dis.  
1007 2013;57(11):1593-9. doi: 10.1093/cid/cit531. PubMed PMID: 23934166; PubMed Central  
1008 PMCID: PMC3888298.
- 1009 60. Tong SY. Genomic polish for shoe-leather epidemiology. Nat Rev Microbiol. 2013;11(1):8.  
1010 doi: 10.1038/nrmicro2935. PubMed PMID: 23202526.

- 1011 61. Conlan S, Thomas PJ, Deming C, Park M, Lau AF, Dekker JP, et al. Single-molecule  
1012 sequencing to track plasmid diversity of hospital-associated carbapenemase-producing  
1013 Enterobacteriaceae. *Sci Transl Med*. 2014;6(254):254ra126. doi:  
1014 10.1126/scitranslmed.3009845. PubMed PMID: 25232178; PubMed Central PMCID:  
1015 PMC4203314.
- 1016 62. Mathers AJ, Stoesser N, Chai W, Carroll J, Barry K, Cherunvanky A, et al. Chromosomal  
1017 Integration of the *Klebsiella pneumoniae* Carbapenemase Gene, blaKPC, in *Klebsiella*  
1018 *Species Is Elusive but Not Rare*. *Antimicrob Agents Chemother*. 2017;61(3). doi:  
1019 10.1128/AAC.01823-16. PubMed PMID: 28031204; PubMed Central PMCID:  
1020 PMC5328509.
- 1021 63. Golubchik T, Batty EM, Miller RR, Farr H, Young BC, Larner-Svensson H, et al. Within-  
1022 host evolution of *Staphylococcus aureus* during asymptomatic carriage. *PLoS One*.  
1023 2013;8(5):e61319. doi: 10.1371/journal.pone.0061319. PubMed PMID: 23658690; PubMed  
1024 Central PMCID: PMC3641031.
- 1025 64. Eyre DW, Cule ML, Griffiths D, Crook DW, Peto TE, Walker AS, et al. Detection of mixed  
1026 infection from bacterial whole genome sequence data allows assessment of its role in  
1027 *Clostridium difficile* transmission. *PLoS Comput Biol*. 2013;9(5):e1003059. doi:  
1028 10.1371/journal.pcbi.1003059. PubMed PMID: 23658511; PubMed Central PMCID:  
1029 PMC3642043.
- 1030 65. Hatherell HA, Colijn C, Stagg HR, Jackson C, Winter JR, Abubakar I. Interpreting whole  
1031 genome sequencing for investigating tuberculosis transmission: a systematic review. *BMC*  
1032 *Med*. 2016;14:21. doi: 10.1186/s12916-016-0566-x. PubMed PMID: 27005433; PubMed  
1033 Central PMCID: PMC4804562.
- 1034 66. Worby CJ, Lipsitch M, Hanage WP. Within-host bacterial diversity hinders accurate  
1035 reconstruction of transmission networks from genomic distance data. *PLoS Comput Biol*.  
1036 2014;10(3):e1003549. doi: 10.1371/journal.pcbi.1003549. PubMed PMID: 24675511;  
1037 PubMed Central PMCID: PMC3967931.

- 1038 67. Conlan S, Park M, Deming C, Thomas PJ, Young AC, Coleman H, et al. Plasmid Dynamics  
1039 in KPC-Positive *Klebsiella pneumoniae* during Long-Term Patient Colonization. *MBio*.  
1040 2016;7(3). doi: 10.1128/mBio.00742-16. PubMed PMID: 27353756.
- 1041 68. Jombart T, Cori A, Didelot X, Cauchemez S, Fraser C, Ferguson N. Bayesian reconstruction  
1042 of disease outbreaks by combining epidemiologic and genomic data. *PLoS Comput Biol*.  
1043 2014;10(1):e1003457. doi: 10.1371/journal.pcbi.1003457. PubMed PMID: 24465202;  
1044 PubMed Central PMCID: PMC3900386.
- 1045 69. Klinkenberg D, Backer JA, Didelot X, Colijn C, Wallinga J. Simultaneous inference of  
1046 phylogenetic and transmission trees in infectious disease outbreaks. *PLoS Comput Biol*.  
1047 2017;13(5):e1005495. doi: 10.1371/journal.pcbi.1005495. PubMed PMID: 28545083;  
1048 PubMed Central PMCID: PMC5436636.
- 1049 70. Ypma RJ, van Ballegooijen WM, Wallinga J. Relating phylogenetic trees to transmission  
1050 trees of infectious disease outbreaks. *Genetics*. 2013;195(3):1055-62. doi:  
1051 10.1534/genetics.113.154856. PubMed PMID: 24037268; PubMed Central PMCID:  
1052 PMC3813836.
- 1053 71. Centers for Disease Control and Prevention, US Department of Health and Human Services.  
1054 Facility Guidance for Control of Carbapenem-resistant Enterobacteriaceae (CRE). 2015.  
1055 Available from: <https://www.cdc.gov/hai/organisms/cre/cre-toolkit/index.html>

1056
